# Supplementary material for: Predicting mortality in acute ischaemic stroke treated with mechanical thrombectomy: analysis of a multicentre prospective registry
Source: PubMed Central journal article supplement — BMJ Open. 2021 Apr 1;11(4):e043415. doi: 10.1136/bmjopen-2020-043415 (PMC8021751; doi:10.1136/bmjopen-2020-043415), 2021-04-01
Supplement: bmjopen-2020-043415.draft_revisions.pdf [file bmjopen-2020-043415.draft_revisions.pdf]

# BMJ Open

BMJ Open is committed to open peer review. As part of this commitment we make the peer review history of every article we publish publicly available.

When an article is published we post the peer reviewers' comments and the authors' responses online. We also post the versions of the paper that were used during peer review. These are the versions that the peer review comments apply to.

The versions of the paper that follow are the versions that were submitted during the peer review process. They are not the versions of record or the final published versions. They should not be cited or distributed as the published version of this manuscript.

BMJ Open is an open access journal and the full, final, typeset and author-corrected version of record of the manuscript is available on our site with no access controls, subscription charges or pay-per-view fees (<http://bmjopen.bmj.com>).

If you have any questions on BMJ Open's open peer review process please email [info.bmjopen@bmj.com](mailto:info.bmjopen@bmj.com)

# BMJ Open

## Pre-procedure predictors of mortality in acute ischemic stroke treated with mechanical thrombectomy: Analysis of a multicenter prospective registry

|                               |                                                                                                                                                                                                                                                                                                                                                                                                                                                                                                                                                                                                                                                                                                                                                                                                                                                                                                                                                                                                                                                                                                                                                                                                                 |
|-------------------------------|-----------------------------------------------------------------------------------------------------------------------------------------------------------------------------------------------------------------------------------------------------------------------------------------------------------------------------------------------------------------------------------------------------------------------------------------------------------------------------------------------------------------------------------------------------------------------------------------------------------------------------------------------------------------------------------------------------------------------------------------------------------------------------------------------------------------------------------------------------------------------------------------------------------------------------------------------------------------------------------------------------------------------------------------------------------------------------------------------------------------------------------------------------------------------------------------------------------------|
| Journal:                      | <i>BMJ Open</i>                                                                                                                                                                                                                                                                                                                                                                                                                                                                                                                                                                                                                                                                                                                                                                                                                                                                                                                                                                                                                                                                                                                                                                                                 |
| Manuscript ID                 | bmjopen-2020-043415                                                                                                                                                                                                                                                                                                                                                                                                                                                                                                                                                                                                                                                                                                                                                                                                                                                                                                                                                                                                                                                                                                                                                                                             |
| Article Type:                 | Original research                                                                                                                                                                                                                                                                                                                                                                                                                                                                                                                                                                                                                                                                                                                                                                                                                                                                                                                                                                                                                                                                                                                                                                                               |
| Date Submitted by the Author: | 20-Aug-2020                                                                                                                                                                                                                                                                                                                                                                                                                                                                                                                                                                                                                                                                                                                                                                                                                                                                                                                                                                                                                                                                                                                                                                                                     |
| Complete List of Authors:     | Li, Hao; Maoming People's Hospital, Neurology<br>Ye, Shisheng; Maoming People's Hospital, Neurology<br>Wu, Yuan-Ling ; Jinan University First Affiliated Hospital, Neurology<br>Huang, Sheng-Ming ; Jinan University First Affiliated Hospital, Neurology<br>Li, Yong-Xin ; Shunde Hospital of Southern Medical University<br>Lu, Kui ; Third People's Hospital of Zhongshan<br>Huang, Jing-Bo ; Maoming People's Hospital<br>Chen, Lve ; Shunde Hospital of Southern Medical University<br>Li, Hong-Zhuang ; Shunde Hospital of Southern Medical University<br>Wu, Wen-Jun ; Third People's Hospital of Zhongshan<br>Wu, Zhi-Lin ; Yunfu People's Hospital<br>Wu, Jian-Zhou ; Yunfu People's Hospital<br>Zhong, Wang-Tao ; Affiliated Hospital of Guangdong Medical University<br>Xian, Wen-Chuan ; Affiliated Hospital of Guangdong Medical University<br>Liao, Feng ; Affiliated Hospital of Guangdong Medical University<br>Tung, Tao-Hsin; Cheng-Hsin General Hospital,<br>Wu, Qiao-ling ; Maoming People's Hospital<br>Chen, Hai ; Maoming People's Hospital<br>Yuan, Li ; Maoming People's Hospital<br>Yang, Zhi; Maoming People's Hospital<br>Huang, Li-an ; Jinan University First Affiliated Hospital |
| Keywords:                     | Stroke medicine < INTERNAL MEDICINE, Vascular medicine < INTERNAL MEDICINE, Neuroradiology < NEUROLOGY, Stroke < NEUROLOGY, VASCULAR SURGERY                                                                                                                                                                                                                                                                                                                                                                                                                                                                                                                                                                                                                                                                                                                                                                                                                                                                                                                                                                                                                                                                    |
|                               |                                                                                                                                                                                                                                                                                                                                                                                                                                                                                                                                                                                                                                                                                                                                                                                                                                                                                                                                                                                                                                                                                                                                                                                                                 |

SCHOLARONE™  
Manuscripts

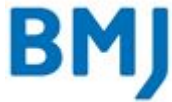

I, the Submitting Author has the right to grant and does grant on behalf of all authors of the Work (as defined in the below author licence), an exclusive licence and/or a non-exclusive licence for contributions from authors who are: i) UK Crown employees; ii) where BMJ has agreed a CC-BY licence shall apply, and/or iii) in accordance with the terms applicable for US Federal Government officers or employees acting as part of their official duties; on a worldwide, perpetual, irrevocable, royalty-free basis to BMJ Publishing Group Ltd ("BMJ") its licensees and where the relevant Journal is co-owned by BMJ to the co-owners of the Journal, to publish the Work in this journal and any other BMJ products and to exploit all rights, as set out in our [licence](#).

The Submitting Author accepts and understands that any supply made under these terms is made by BMJ to the Submitting Author unless you are acting as an employee on behalf of your employer or a postgraduate student of an affiliated institution which is paying any applicable article publishing charge ("APC") for Open Access articles. Where the Submitting Author wishes to make the Work available on an Open Access basis (and intends to pay the relevant APC), the terms of reuse of such Open Access shall be governed by a Creative Commons licence – details of these licences and which [Creative Commons](#) licence will apply to this Work are set out in our licence referred to above.

Other than as permitted in any relevant BMJ Author's Self Archiving Policies, I confirm this Work has not been accepted for publication elsewhere, is not being considered for publication elsewhere and does not duplicate material already published. I confirm all authors consent to publication of this Work and authorise the granting of this licence.

1  
2  
3 ***Pre-procedure predictors of mortality in acute ischemic stroke treated***  
4 ***with mechanical thrombectomy: Analysis of a multicenter***  
5 ***prospective registry***  
6

7  
8 Hao Li<sup>1,†</sup>, Shi-sheng Ye<sup>1,†</sup>, Yuan-ling Wu<sup>2</sup>, Sheng-ming Huang<sup>2</sup>, Yong-xin Li<sup>3</sup>, Kui Lu<sup>4</sup>, Jing-bo Huang<sup>1</sup>,  
9 Lve Chen<sup>3</sup>, Hong-zhuang Li<sup>3</sup>, Wen-jun Wu<sup>4</sup>, Zhi-lin Wu<sup>5</sup>, Jian-zhou Wu<sup>5</sup>, Wang-tao Zhong<sup>6</sup>, Wen-chuan  
10 Xian<sup>6</sup>, Feng Liao<sup>6</sup>, Tao-hsin Tung<sup>7</sup>, Qiao-ling Wu<sup>1</sup>, Hai Chen<sup>1</sup>, Li Yuan<sup>1</sup>, Zhi Yang<sup>1\*</sup>, Li-an Huang<sup>2 \*</sup>  
11  
12  
13

14  
15 Corresponding Author:

16  
17 Zhi Yang E-mail: [mmyangz@163.com](mailto:mmyangz@163.com); Li-an Huang E-mail: [huanglian1306@126.com](mailto:huanglian1306@126.com)  
18

19 †Both authors contributed equally to this work.  
20  
21  
22

23 Number of Tables: 3; Number of Figures: 1; Word count: 2470.  
24

25 Keywords: acute ischemic stroke, mechanical thrombectomy, mortality, predictors, score  
26  
27  
28  
29  
30  
31  
32  
33  
34  
35  
36  
37  
38  
39  
40  
41  
42  
43  
44  
45  
46  
47  
48  
49  
50  
51  
52  
53  
54  
55  
56  
57  
58  
59  
60

## Abstract

**Objectives:** We aimed to determine pre-procedure predictors of mortality within 90 days and develop a simple score for patients with mechanical thrombectomy(MT).

**Design:** Analysis of a multicenter prospective registry.

**Setting:** In six participating centers, acute ischemic stroke patients (AIS) treated by MT between March 2017 and May 2018 were documented prospectively.

**Participants:** 224 patients with AIS were treated by MT.

**Results:** Of 224 patients, 49 (21.9%) patients died, and 87 (38.8%) were independent. Variables associated with 90-day mortality were age, previous stroke, admission National Institutes of Health Stroke Scale (NIHSS), fasting blood glucose (FBG) and occlusion site. Logistic regression identified 4 variables independently associated with 90-day mortality: age $\geq$ 80 (OR 3.26, 95% CI 1.45-7.33), previous stroke (OR 2.33, 95% CI 1.04-5.21), admission NIHSS $\geq$ 18 (OR 2.37, 95% CI 1.13-4.99), and internal carotid artery (ICA) or basilar artery (BA) occlusion (OR 2.92, 95% CI 1.34-6.40). Using these data, we developed Predicting 90-days mortality of acute ischemic stroke with mechanical thrombectomy (PRACTICE) score ranging from 0 to 6 points. The area under the curve (AUC) of the score was 0.744 (95% CI 0.669-0.820), which suggested moderate diagnostic value for the prediction of 90-day mortality.

**Conclusions:** We developed a simple score to estimate the 90-day mortality of AIS patients treated with MT. But the score needs to be prospectively validated.

### Strengths and limitations of this study

The study used multicenter prospective data from consecutively admitted ischemic stroke patients treated with mechanical thrombectomy.

Multivariate logistic regression analysis only used variables before the procedure, predicting 90-day mortality before mechanical thrombectomy.

The PRACTICE score was only validated in the primary dataset, and future external validation should be performed in another dataset.

## Introduction

Previous randomized controlled trials (RCTs) have demonstrated the overwhelming benefit of mechanical thrombectomy (MT) for acute ischemic stroke (AIS) due to emergent large vessel occlusion[1-6]. Although patients undergo MT as first-line therapy, the mortality within 90 days remains high: more than 30% in patients with acute basilar artery occlusion and approximately 15% in patients with large-vessel occlusion in the anterior circulation[6,7]. In the last few years, a considerable number of studies have found predictors associated with mortality in ischemic stroke patients, but only a few studies have focused on predictors of mortality in patients treated with MT[7-10]. Overall, the pre-procedure predictors related to mortality of patients with MT remain unknown, and it is critical to avoid futile MT by predicting mortality from clinical and imaging information available prior to MT. Our study aimed to determine pre-procedure predictors of mortality within 90 days and develop a simple scoring instrument for patients with MT in a multicenter prospective registry study for endovascular treatment of acute ischemic stroke (ET-AIS).

## Method

### Patients Selection

Three hundred and two consecutive patients presenting with acute ischemic stroke treated by endovascular treatment (EVT) were registered in the ET-AIS registry during March 2017 and May 2018. ET-AIS was a multicenter, prospective and observational registry study involving 6 comprehensive stroke centers in China. Patients receiving intravenous thrombolysis prior to EVT were acceptable, consistent with current guidelines[11]. The registry study protocol was approved by the ethics committee of each participating center and registered on the Chinese Clinical Trial Registry (<http://www.chictr.org.cn>; ChiCTR-OOC-17013052).

All consecutive patients with the following criteria were included: (1) age 18 years or older; (2) diagnosis of an AIS with proven large vessel occlusion confirmed by digital subtraction angiography (DSA); (3) treatment with or without intravenous thrombolysis prior to MT; and (4) treated with MT within 12 hours of symptom onset. Patients with prestroke functional dependence (modified Rankin Scale [MRS] score  $>2$ ) and only intracranial large vascular stenosis or anterior cerebral artery (ACA) or posterior cerebral artery (PCA) occlusion were excluded.

### Study Variables and Outcome Definition

All data, including baseline characteristics, procedure details and outcome, were recorded on case report forms (CRFs). Patient demographics included age and gender. The main vascular risk factors included smoking, hypertension, diabetes, coronary artery disease, atrial fibrillation, and previous stroke. Laboratorial tests included admission fasting plasma glucose (FPG) and admission low-density lipoprotein cholesterol (LDL-C). Clinical and radiological data included the admission National Institute of Health Stroke Scale (NIHSS) score, Alberta Stroke Program Early CT Score (ASPECTS) on noncontrast computed tomography (CT), occlusion site, Trial of ORG 10172 in the Acute Stroke Treatment (TOAST) classification, preprocedure modified thrombolysis as per the cerebral infarction [m-TICI] score, time from onset to arrival at the stroke center, and time from onset to groin puncture. Procedure details included intravenous thrombolysis (IVT) prior to the procedure, methods of anesthesia, procedural approaches, procedure-related complications, time from onset to recanalization, and time from groin puncture to recanalization. Outcomes included successful recanalization (defined as postprocedure thrombolysis in cerebral infarction (TICI)  $\geq 2b$ ), intracranial hemorrhage within 24

1  
2  
3 hours post-MT confirmed on neuroimaging (CT or MRI), 90-day favorable outcome (defined as  
4 MRS $\leq$ 2), and 90-day mortality (defined as MRS=6). Intracranial hemorrhage (ICH) was defined by  
5 the Heidelberg Bleeding Classification[12] and classified into symptomatic intracranial hemorrhage  
6 (SICH) and asymptomatic intracranial hemorrhage (aSICH). A follow-up was performed at 90 days by  
7 neurological physicians or trained research nurses during face-to-face interviews or via telephone  
8 conversations with the patient, their relatives, or their general practitioner.  
9

### 10 11 **Endovascular Procedures**

12  
13 Before entry into the neuroangiography suite, all patients or legally authorized representatives signed  
14 informed consent forms. All procedures were performed under general anesthesia or conscious  
15 sedation. The major revascularization method was MT using a stent retriever or direct aspiration at the  
16 operator's discretion. If underlying intracranial atherosclerotic stenosis (ICAS) was detected, balloon  
17 angioplasty or stenting was performed when considered necessary. Intra-arterial thrombolysis was  
18 allowed as adjuvant therapy for some patients. Recanalization status was quantified by using the TICI  
19 score based on the final angiogram, and successful recanalization was defined as a TICI score  $\geq$ 2b[13].  
20 All patients underwent head CT scan or magnetic resonance imaging within 24 hours after the  
21 procedure to assess hemorrhagic complications. Specific endovascular procedures and preoperative  
22 anesthesia methods were chosen by operators at each center. For postoperative antithrombotic drugs,  
23 antiplatelet drugs or anticoagulants were selected depending on the stroke etiology.  
24  
25  
26

### 27 **Statistical Analysis and Score Development**

28  
29 Statistical analyses were performed using SPSS 25.0 (SPSS, Chicago, IL, USA). A *P* value  $<$ 0.05 was  
30 considered statistically significant (2-sided). Continuous variables are reported as the means  $\pm$   
31 standard deviation or medians (interquartile range [IQR]), and categorical variables are reported as  
32 frequencies. Comparisons were performed on mortality and survival using the Pearson chi-square test,  
33 independent-samples *t* test, and Mann-Whitney *U* test. To account for multiple testing, the significance  
34 level was set at *P* $<$ 0.05. Multivariate logistic regression analysis was performed to determine  
35 independent predictors for 90-day mortality. We tested the association of procedure-related variables  
36 with mortality; however, because the primary goal of the study was predicting mortality before the  
37 procedure, these variables were not used in the multivariate model.  
38  
39  
40

41 The PRACTICE score was developed based on variables that were independently associated with  
42 90-day mortality in multivariate analysis. By rounding to the next positive integer value, the score  
43 point could be defined according to the value of the  $\beta$ -coefficient, and the total risk score could be  
44 calculated by summing all the components of the score. The threshold values of the PRACTICE score  
45 were determined by using a receiver operating characteristic (ROC) curve and its sensitivity and  
46 specificity to evaluate the authenticity and accuracy of the PRACTICE score.  
47  
48  
49

### 50 **Results**

51  
52 During the study period, a total of 303 patients with AIS were treated by endovascular recanalization  
53 in six participating centers. Of these, 79 patients were excluded from the present study analysis for  
54 the following reasons: lost to follow-up at 90 days (n=12), only stenosis (n=54), ACA occlusion (n=5),  
55 PCA occlusion (n=3), and VA occlusion (n=5). A total of 224 patients finally met the study inclusion  
56 criteria. The mean age was 67.08 $\pm$ 12.94 years, and 39.7% were female. Procedure-related  
57 complications occurred in 77 patients (34.3%), including vasospasm (n=33), stent thrombosis (n=4),  
58  
59  
60

1  
2  
3 dissection (n=8), new vessel occlusion (n=29), and SAH caused by vascular perforation (n=3). ICH  
4 occurred in 25 patients, among whom 8 (3.6%) were symptomatic. At the 90-day follow-up, 49  
5 (21.9%) patients had died, and 87 (38.8%) were independent (90-day MRS  $\leq 2$ ).

7  
8 The mortality group had a significantly higher prevalence of age  $\geq 80$  ( $P < 0.001$ ), previous stroke  
9 ( $P = 0.049$ ), admission NIHSS score  $\geq 18$  ( $P < 0.001$ ), FPG  $> 150$  mg/dl ( $P = 0.023$ ), and ICA or BA occlusion  
10 ( $P = 0.001$ ) than the survival group had (Table 1). There was no significant difference in the use of IVT,  
11 general anesthesia, stenting, procedure-related complications, recanalization or ICH between the  
12 mortality group and the survival group. In a multivariate logistic regression analysis (Table 2), age  $\geq 80$   
13 (adjusted odds ratio, 3.26; 95% CI, 1.45-7.33;  $P = 0.004$ ), previous stroke (adjusted odds ratio, 2.33;  
14 95% CI, 1.04-5.21;  $P = 0.040$ ), admission NIHSS score  $\geq 18$  (adjusted odds ratio, 2.37; 95% CI, 1.13-4.99;  
15  $P = 0.023$ ), and ICA or BA occlusion (adjusted odds ratio, 2.92; 95% CI, 1.34-6.40;  $P = 0.007$ ) remained  
16 independently associated with a higher risk of 90-day mortality.  
17  
18  
19

20  
21 All variables positively associated with early stroke mortality in the multivariate model were  
22 subsequently used to develop the PRACTICE score, which is shown in Table 3. The AUC of the  
23 PRACTICE score was 0.744 (95% CI 0.669-0.820,  $P < 0.001$ ), which suggested moderate diagnostic value  
24 for the prediction of 90-day mortality (Figure 1). In terms of the cut-off value,  $\geq 2.5$  had a sensitivity of  
25 69%, specificity of 67%, positive predictive value of 37%, and negative predictive value of 89% for  
26 predicting 90-day mortality.  
27

## 28 Discussion

29  
30 In our study, we used data from a multicenter prospective registry to identify pretreatment risk  
31 factors for 90-day mortality of AIS treated with MT. The score consists of 4 clinical and imaging  
32 variables: age, previous stroke, admission NIHSS and occlusion site, which can explain 69% of 90-day  
33 mortality and may provide useful information in the process of decision-making before MT.  
34  
35

36  
37 Other studies to find pre-procedure predictors of outcome among patients undergoing endovascular  
38 treatment have been conducted. The earliest prediction model for the poor outcome of AIS with  
39 endovascular treatment is the Houston intra-arterial recanalization therapy (HIAT) score developed in  
40 2009[14]. The HIAT score involves age  $\geq 75$  years, NIHSS  $\geq 18$  and admission glucose  $\geq 150$  mg/dl,  
41 with a total score of 3. The increasing HIAT scores revealed an increase in the rate of poor outcome on  
42 hospital discharge. The HIAT score is entirely based on clinical variables. However, there are a  
43 number of imaging factors that may correlate with outcome after endovascular treatment. The HIAT2  
44 score is the optimized version of the HIAT score by inclusion of ASPECTS, which more accurately  
45 predicts poor outcome after intra-arterial recanalization therapy in anterior circulation occlusions[15].  
46 The Stanford Age and DWI (SAD) score, a score encompassing age and diffusion-weighted imaging  
47 lesion volume[16], showed only a slightly better predictive accuracy than the HIAT score in the  
48 validation cohort (AUC for SAD = 0.69; HIAT = 0.66). Therefore, the HIAT2 and SAD scores  
49 suggest that the addition of imaging variables to a clinical prediction scoring system may enhance the  
50 ability to predict a poor outcome following endovascular treatment. However, no model seems  
51 suitable for making individual patient decisions because of their modest AUC values. In addition, the  
52 above mentioned score focused on poor outcome (MRS 4-6 points), not worst outcome/mortality. The  
53 totaled health risks in vascular events (THRIVE) incorporate history of hypertension, history of atrial  
54 fibrillation, DM, age, and stroke severity, and this assessment strongly predicts mortality at 90 days  
55  
56  
57  
58  
59  
60



(ROC AUC= 0.709)[10]. However, the THRIVE score only consists of clinical variables and lacks imaging variables that could contribute to mortality.

Our work is in agreement with previous research that has identified the occlusion site of the internal carotid artery/basilar artery as an independent predictor of 90-day mortality[7]. In that study, successfully recanalized patients had lower mortality (25.2% versus 46.9%,  $P<0.001$ ). In our study, the survival group had higher rates of successful recanalization than the mortality group, but the difference was not statistically significant. In particular, a multiple regression analysis of the North American Solitaire Acute Stroke (NASA) registry showed that occlusion sites of the internal carotid artery or basilar artery carry a worse prognosis than middle cerebral artery (MCA) occlusions despite successful recanalization[17]. Another study examined patients with acute occlusion of the distal ICA treated with IAT or IV rt-PA, and the mortality rate was 50% despite complete recanalization[18]. Although basilar occlusion accounts for approximately 5–10% of all proximal intracranial occlusions, the mortality is higher than that in patients with large vessel occlusion of the anterior circulation[6,7]. This correlation may be the result of a high lesion volume with proximal arterial occlusion, which is an independent predictor of 90-day mortality[16,19].

High NIHSS on admission has previously been correlated with poor outcomes or mortality after endovascular treatment by several studies<sup>3,7-10</sup>. In the present study, we determined a cut-off value of 18, which was predictive of 90-day mortality despite recanalization. Patients who present with a high NIHSS have even poorer outcomes with intravenous therapy or medical management compared with endovascular treatment[3].

Age has previously been associated with poor outcome in patients treated with intravenous therapy and endovascular treatment[14,15,10,16,20]. In our study, age  $\geq 80$  years was a significant independent predictor of 90-day mortality and scored two points in the model. Very recently, an analysis of German Stroke Registry–Endovascular Treatment (GSR-ET) showed that patients aged  $\geq 90$  years have higher mortality for thrombectomy[21]. Decision-making for thrombectomy in patients aged  $\geq 90$  years should be premised on a case-by-case basis with regard to admission NIHSS and ASPECT scores.

PRACTICE score has only moderate predictive power (AUC=0.74) for predicting mortality, which seems unsuitable for making decision to proceed to MT. However, the MT decision should be made individually based on clinical judgment and family decision. Until prospective data from randomized trials are available, the PRACTICE score could be useful to provide valuable prognostic data and to adjust expectations of outcome before MT.

### Limitations

There are several limitations to our study. Firstly, the PRACTICE score was only validated in the primary dataset. Future external validation should be performed in another dataset. Secondly, the imaging assessments were not adjudicated by a core laboratory, which could introduce a bias in estimates. Thirdly, potential Berkson's bias (selection bias) was inevitable due to the hospital-based study design. This population was not only exactly representative of the whole general population, but it was also difficult to estimate the mortality of a matched total population sample in China, preferably in the region of Guangdong. Fourthly, some of the clinical variables obtained from medical records could have resulted in misclassification bias. Nevertheless, it seems reasonable to assume that if misclassification bias was present, it was not related to all-cause mortality, thus could be viewed as

1  
2  
3 nondifferential misclassification. Finally, the small sample size limited stratified analysis of predictor  
4 for insufficient statistical power, such as age and NIHSS score.  
5

### 6 **Conclusion**

7  
8 In summary, a prediction score based on age, previous stroke, admission NIHSS and occlusion site  
9 predicted 90-day mortality following MT with moderate accuracy. This score may provide useful  
10 information in the process of decision-making before MT. But the score needs to be prospectively  
11 validated.  
12  
13  
14  
15  
16  
17

### 18 **Author affiliations**

19  
20 <sup>1</sup> Department of Neurology, Maoming People's Hospital, Maoming, Guangdong, China.  
21

22 <sup>2</sup> Department of Neurology, First Affiliated Hospital of Jinan University, Guangzhou, Guangdong,  
23 China.  
24

25 <sup>3</sup> Department of Neurology, Shunde Hospital of Southern Medical University, Foshan, Guangdong,  
26 China.  
27

28 <sup>4</sup> Department of Neurology, Zhongshan People's Hospital, Zhongshan, Guangdong, China.  
29

30 <sup>5</sup> Department of Neurology, Yunfu People's Hospital, Yunfu, Guangdong, China.  
31

32 <sup>6</sup> Department of Neurology, Affiliated Hospital of Guangdong Medical University, Zhanjiang, Guang-  
33 dong, China.  
34

35 <sup>7</sup> Department of Medicinal Research and Education, Cheng-Hsin General Hospital, Taipei, Taiwan,  
36 China.  
37  
38  
39  
40  
41  
42  
43  
44  
45  
46  
47  
48  
49  
50  
51  
52  
53  
54  
55  
56  
57  
58  
59  
60

1  
2  
3 **Acknowledgement** : We thank all ET-AIS registry collaborators.  
4

### 5 **Author Contributions**

6  
7 Zhi Yang and Li'an Huang organized this research. Hao Li and Shi-sheng Ye were mainly responsible  
8 for collecting data, data proofreading, data statistical analysis and writing the paper. All the authors  
9 participated in the initiation of the research project and the design of the research contents. The  
10 research plan and paper case report form (CRF) were written by Zhi Yang, Li'an Huang, Hong-zhuang  
11 Li, Wen-jun Wu, Zhi-lin Wu and Wang-tao Zhong. Yuan-ling Wu, Sheng-ming Huang, Hao Li, Shi-  
12 sheng Ye, Yong-xin Li, Kui Lu, Jing-bo Huang, Qiao-ling Wu, Hai Chen, Li Yuan, Lve Chen, Jian-  
13 zhou Wu, Wen-chuan Xian and Feng Liao were mainly responsible for the collection of cases in each  
14 center, completion of the paper CRF and the registration of data on the eCRF registration website. All  
15 authors have read and approved the final manuscript.  
16  
17  
18  
19  
20  
21

### 22 **Statement of Ethics**

23  
24 The registry study protocol was approved by the ethics committee of First Affiliated Hospital of Jinan  
25 University (ID:2017007).  
26

### 27 **Conflict of Interest Statement**

28  
29 The authors have no conflicts of interest to declare.  
30

### 31 **Patient and Public Involvement**

32  
33 Patients and/or the public were not involved in the design, or conduct, or reporting, or dissemination  
34 plans of this research.  
35  
36

### 37 **Funding Sources**

38  
39 This study was supported by Guangdong Natural Fund Project (No: 32218145), High-level Hospital  
40 Construction Research Project of Maoming People's Hospital and The Science and Technology Plan  
41 Project of Maoming (No: 2017004).  
42  
43  
44

45 **Data sharing statement** : The data that support the findings of this study are available from the  
46 corresponding author upon reasonable request.  
47  
48  
49  
50  
51  
52  
53  
54  
55  
56  
57  
58  
59  
60

## References

- 1 Campbell BC, Mitchell PJ, Kleinig TJ, et al. Endovascular therapy for ischemic stroke with perfusion-imaging selection. *N Engl J Med*. 2015;372:1009-18.
- 2 Saver JL, Goyal M, Bonafe A, et al. Stent-retriever thrombectomy after intravenous t-PA vs. t-PA alone in stroke. *N Engl J Med*. 2015;372:2285-95.
- 3 Goyal M, Demchuk AM, Menon BK, et al. Randomized assessment of rapid endovascular treatment of ischemic stroke. *N Engl J Med*. 2015;372:1019-30.
- 4 Berkhemer OA, Fransen PS, Beumer D, et al. A randomized trial of intraarterial treatment for acute ischemic stroke. *N Engl J Med*. 2015;372:11-20.
- 5 Jovin TG, Chamorro A, Cobo E, et al. Thrombectomy within 8 hours after symptom onset in ischemic stroke. *N Engl J Med*. 2015;372:2296-306.
- 6 Liu X, Dai Q, Ye R, et al. Endovascular treatment versus standard medical treatment for vertebrobasilar artery occlusion (BEST): an open-label, randomised controlled trial. *Lancet Neurol*. 2020;19:115-22.
- 7 Linfante I, Walker GR, Castonguay AC, et al. Predictors of Mortality in Acute Ischemic Stroke Intervention: Analysis of the North American Solitaire Acute Stroke Registry. *Stroke*. 2015;46:2305-8.
- 8 Flint AC, Cullen SP, Faigeles BS, et al. Predicting long-term outcome after endovascular stroke treatment: the totaled health risks in vascular events score. *AJNR American journal of neuroradiology*. 2010;31:1192-6.
- 9 Gory B, Mazighi M, Labreuche J, et al. Predictors for Mortality after Mechanical Thrombectomy of Acute Basilar Artery Occlusion. *Cerebrovasc Dis*. 2018;45:61-67.
- 10 Gattringer T, Posekany A, Niederkorn K, et al. Predicting Early Mortality of Acute Ischemic Stroke. *Stroke*. 2019;50:349-56.
- 11 W. J. Powers, A. A. Rabinstein, T. Ackerson, et al. 2018 Guidelines for the Early Management of Patients With Acute Ischemic Stroke: A Guideline for Healthcare Professionals From the American Heart Association/American Stroke Association. *Stroke*. 2018 Mar;49:e46-e110.
- 12 von Kummer R, Broderick JP, Campbell BC, et al. The Heidelberg Bleeding Classification: Classification of Bleeding Events After Ischemic Stroke and Reperfusion Therapy. *Stroke*. 2015;46:2981-6.
- 13 Zaidat OO, Yoo AJ, Khatri P, et al. Recommendations on angiographic revascularization grading standards for acute ischemic stroke: a consensus statement. *Stroke*. 2013;44:2650-63.
- 14 Hallevi H, Barreto AD, Liebeskind DS, et al. Identifying patients at high risk for poor outcome after intra-arterial therapy for acute ischemic stroke. *Stroke*. 2009;40:1780-5.
- 15 Sarraj A, Albright K, Barreto AD, et al. Optimizing prediction scores for poor outcome after intra-arterial therapy in anterior circulation acute ischemic stroke. *Stroke*. 2013;44:3324-30.
- 16 Liggins JT, Yoo AJ, Mishra NK, et al. A score based on age and DWI volume predicts poor outcome following endovascular treatment for acute ischemic stroke. *International journal of stroke : official journal of the International Stroke Society*. 2015;10:705-9.

- 1  
2  
3 17 Linfante I, Starosciak AK, Walker GR, et al. Predictors of poor outcome despite recanalization: a  
4 multiple regression analysis of the NASA registry. *Journal of neurointerventional surgery*.  
5 2016;8:224-9.  
6  
7  
8 18 Zaidat OO, Suarez JI, Santillan C, et al. Response to intra-arterial and combined intravenous and  
9 intra-arterial thrombolytic therapy in patients with distal internal carotid artery occlusion. *Stroke*.  
10 2002;33:1821-6.  
11  
12  
13 19 Panni P, Gory B, Xie Y, et al. Acute Stroke With Large Ischemic Core Treated by  
14 Thrombectomy. *Stroke*. 2019;50:1164-71.  
15  
16  
17 20 Tissue plasminogen activator for acute ischemic stroke. *N Engl J Med*. 1995;333:1581-7.  
18  
19 21 Meyer L, Alexandrou M, Flottmann F, et al. Endovascular Treatment of Very Elderly Patients  
20 Aged  $\geq 90$  With Acute Ischemic Stroke. *J Am Heart Assoc*. 2020;9:e014447.  
21  
22  
23  
24  
25  
26  
27  
28  
29  
30  
31  
32  
33  
34  
35  
36  
37  
38  
39  
40  
41  
42  
43  
44  
45  
46  
47  
48  
49  
50  
51  
52  
53  
54  
55  
56  
57

58 Table 1. Bivariate Analysis for 90-Day Mortality  
59  
60

| Variables                           | Mortality  |       | Survival   |       | P Value         |
|-------------------------------------|------------|-------|------------|-------|-----------------|
|                                     | N=49       |       | N=175      |       |                 |
| ≥80, n (%)                          | 18         | 36.7% | 25         | 14.3% | <i>P</i> 0.001  |
| Male sex, n (%)                     | 31         | 63.3% | 104        | 59.4% | <i>P</i> =0.628 |
| Smoking, n (%)                      | 12         | 24.5% | 46         | 26.3% | <i>P</i> =0.800 |
| Hypertension, n (%)                 | 27         | 55.1% | 80         | 45.7% | <i>P</i> =0.245 |
| Diabetes, n (%)                     | 12         | 24.5% | 28         | 16.0% | <i>P</i> =0.170 |
| Atrial fibrillation, n (%)          | 18         | 36.7% | 54         | 30.9% | <i>P</i> =0.436 |
| Coronary artery disease, n (%)      | 9          | 18.4% | 17         | 9.7%  | <i>P</i> =0.095 |
| Previous stroke, n (%)              | 16         | 32.7% | 34         | 19.4% | <i>P</i> =0.049 |
| TOAST classification, n (%)         |            |       |            |       | <i>P</i> =0.902 |
| Large artery atherosclerosis, n (%) | 18         | 36.7% | 68         | 38.9% |                 |
| Cardioembolism, n (%)               | 21         | 42.9% | 79         | 45.1% |                 |
| Others, n (%)                       | 10         | 20.4% | 28         | 16.0% |                 |
| Admission NIHSS score≥18, n (%)     | 33         | 67.3% | 66         | 37.7% | <i>P</i> 0.001  |
| FPG 150 mg/dl                       | 22         | 47.8% | 50         | 29.9% | <i>P</i> =0.023 |
| LDL 160 mg/dl                       | 12 (26.7%) |       | 31 (18.6%) |       | <i>P</i> =0.230 |
| Time from onset to groin puncture   |            |       |            |       | <i>P</i> =0.611 |
| 6.0 hours, n (%)                    | 27         | 55.1% | 110        | 62.9% |                 |
| 6.0-12.0 hours, n (%)               | 19         | 38.8% | 57         | 32.6% |                 |
| ≥12 hours, n (%)                    | 3          | 6.1%  | 8          | 4.6%  |                 |
| ASPECTS≥6, n (%)                    | 30         | 88.2% | 148        | 94.9% | <i>P</i> =0.233 |
| Occlusion site, n (%)               |            |       |            |       | <i>P</i> =0.001 |
| MCA, n (%)                          | 13         | 26.5% | 92         | 52.6% |                 |
| ICA/BA, n (%)                       | 36         | 73.5% | 83         | 47.4% |                 |
| Use of IVT, n (%)                   | 19         | 38.8% | 67         | 38.3% | <i>P</i> =0.950 |
| General anaesthesia                 | 6          | 12.0% | 27         | 15.4% | <i>P</i> =0.143 |

| Thrombectomy scheme, n (%)                                    |            |       |             | <i>P</i> =0.156 |                 |
|---------------------------------------------------------------|------------|-------|-------------|-----------------|-----------------|
| Balloon guiding catheter                                      | 1          | 2.0%  | 1           | 0.6%            |                 |
| Direct-aspiration first-pass technique                        | 9          | 18.4% | 17          | 9.7%            |                 |
| Solumbra                                                      | 4          | 8.2%  | 36          | 20.6%           |                 |
| Stent retriever-mediated manual aspiration thrombectomy       | 2          | 4.1%  | 14          | 8.0%            |                 |
| Routine embolectomy                                           | 30         | 61.2% | 94          | 53.7%           |                 |
| Mixed scheme                                                  | 3          | 6.1%  | 13          | 7.4%            |                 |
| Stenting (extracranial stenting and/or intracranial stenting) | 21         | 41.2% | 69          | 38.8%           | <i>P</i> =0.756 |
| Procedure-related complications                               |            |       |             | <i>P</i> =0.605 |                 |
| Vasospasm                                                     | 5          | 10.4% | 28          | 16.1%           |                 |
| Stent thrombosis                                              | 0          | 0%    | 4           | 2.3%            |                 |
| Dissection                                                    | 2          | 4.2%  | 6           | 3.4%            |                 |
| Embolism in a new territory                                   | 9          | 18.8% | 20          | 11.5%           |                 |
| SAH caused by vascular perforation                            | 1          | 2.1%  | 2           | 1.1%            |                 |
| Recanalization (postprocedure mTICI <sub>≥2b</sub> )          | 44 (86.3%) |       | 157 (89.7%) | <i>P</i> =0.491 |                 |
| ICH                                                           |            |       |             | <i>P</i> =0.915 |                 |
| SICH                                                          | 3(4.1%)    |       | 5 (2.9%)    |                 |                 |
| aSICH                                                         | 6 (12.2%)  |       | 11 (6.3%)   |                 |                 |

Table 2. Multivariate Logistic Regression Model Including Variables Associated with 90-Day Mortality

| Variables                       | $\beta$   | OR (95% CI)      | <i>P</i> Value  |
|---------------------------------|-----------|------------------|-----------------|
| Age $\geq$ 80                   | 1.181     | 3.26 (1.45-7.33) | <i>P</i> =0.004 |
| Previous stroke                 | 0.844     | 2.33 (1.04-5.21) | <i>P</i> =0.040 |
| Admission NIHSS score $\geq$ 18 | 0.863     | 2.37 (1.13-4.99) | <i>P</i> =0.023 |
| FPG 150 mg/dl                   | 0.646     | 1.91 (0.92-3.97) | <i>P</i> =0.084 |
| Occlusion site                  |           |                  |                 |
| MCA                             | Reference | Reference        | Reference       |
| ICA/BA                          | 1.072     | 2.92 (1.34-6.40) | <i>P</i> =0.007 |

Table 3. Predicting 90-Day Mortality of AIS with MT (PRACTICE)

| Risk factors for 90-day mortality | Points |
|-----------------------------------|--------|
| Age $\geq$ 80                     | 2      |
| Previous stroke                   | 1      |
| ICA/BA occlusion                  | 2      |
| Admission NIHSS $\geq$ 18         | 1      |
| Maximal score points              | 6      |



1  
2  
3  
4  
5  
6  
7  
8  
9  
10  
11  
12  
13  
14  
15  
16  
17  
18  
19  
20  
21  
22  
23  
24  
25  
26  
27  
28  
29  
30  
31  
32  
33  
34  
35  
36  
37  
38  
39  
40  
41  
42  
43  
44  
45  
46  
47  
48  
49  
50  
51  
52  
53  
54  
55  
56  
57  
58  
59  
60

For peer review only

Figure 1. AUC of the Predicting 90-Day Mortality of AIS with MT (PRACTICE) score.

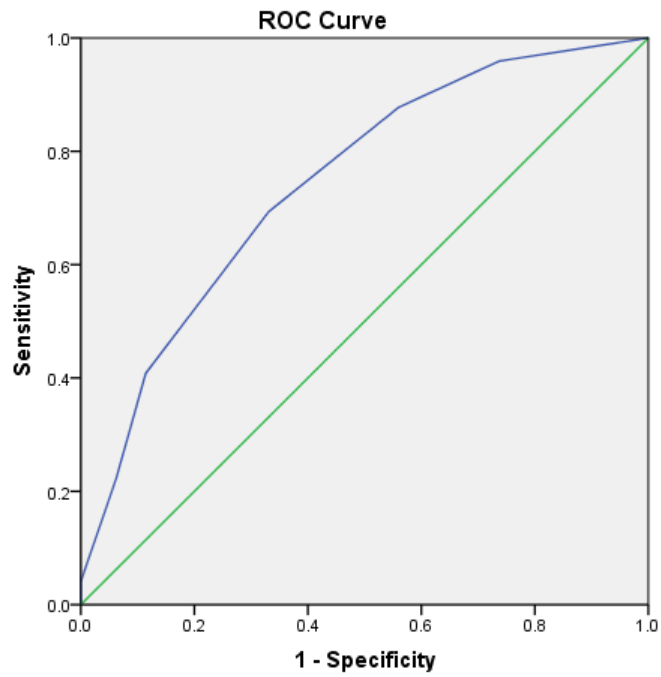

## STROBE Statement—checklist of items that should be included in reports of observational studies

|                              | Item No | Recommendation                                                                                                                                                                             | Page No |
|------------------------------|---------|--------------------------------------------------------------------------------------------------------------------------------------------------------------------------------------------|---------|
| <b>Title and abstract</b>    | 1       | (a) Indicate the study's design with a commonly used term in the title or the abstract                                                                                                     | 1       |
|                              |         | (b) Provide in the abstract an informative and balanced summary of what was done and what was found                                                                                        | 2       |
| <b>Introduction</b>          |         |                                                                                                                                                                                            |         |
| Background/rationale         | 2       | Explain the scientific background and rationale for the investigation being reported                                                                                                       | 3       |
| Objectives                   | 3       | State specific objectives, including any prespecified hypotheses                                                                                                                           | 3       |
| <b>Methods</b>               |         |                                                                                                                                                                                            |         |
| Study design                 | 4       | Present key elements of study design early in the paper                                                                                                                                    | 3       |
| Setting                      | 5       | Describe the setting, locations, and relevant dates, including periods of recruitment, exposure, follow-up, and data collection                                                            | 3       |
| Participants                 | 6       | (a) <i>Cohort study</i> —Give the eligibility criteria, and the sources and methods of selection of participants. Describe methods of follow-up                                            | 3       |
|                              |         | <i>Case-control study</i> —Give the eligibility criteria, and the sources and methods of case ascertainment and control selection. Give the rationale for the choice of cases and controls |         |
|                              |         | <i>Cross-sectional study</i> —Give the eligibility criteria, and the sources and methods of selection of participants                                                                      |         |
|                              |         | (b) <i>Cohort study</i> —For matched studies, give matching criteria and number of exposed and unexposed                                                                                   | n/a     |
|                              |         | <i>Case-control study</i> —For matched studies, give matching criteria and the number of controls per case                                                                                 |         |
| Variables                    | 7       | Clearly define all outcomes, exposures, predictors, potential confounders, and effect modifiers. Give diagnostic criteria, if applicable                                                   | 3-4     |
| Data sources/<br>measurement | 8*      | For each variable of interest, give sources of data and details of methods of assessment (measurement). Describe comparability of assessment methods if there is more than one group       | 3-4     |
| Bias                         | 9       | Describe any efforts to address potential sources of bias                                                                                                                                  | 7       |
| Study size                   | 10      | Explain how the study size was arrived at                                                                                                                                                  | n/a     |

|    |                        |    |                                                                                                                              |
|----|------------------------|----|------------------------------------------------------------------------------------------------------------------------------|
| 1  |                        |    |                                                                                                                              |
| 2  | Quantitative variables | 11 | Explain how quantitative variables were handled in the analyses. If applicable, describe which groupings were chosen and why |
| 3  |                        |    | n/a                                                                                                                          |
| 4  |                        |    |                                                                                                                              |
| 5  | Statistical methods    | 12 | (a) Describe all statistical methods, including those used to control for confounding                                        |
| 6  |                        |    | 4                                                                                                                            |
| 7  |                        |    |                                                                                                                              |
| 8  |                        |    |                                                                                                                              |
| 9  |                        |    | (b) Describe any methods used to examine subgroups and interactions                                                          |
| 10 |                        |    | n/a                                                                                                                          |
| 11 |                        |    |                                                                                                                              |
| 12 |                        |    | (c) Explain how missing data were addressed                                                                                  |
| 13 |                        |    | n/a                                                                                                                          |
| 14 |                        |    | (d) <i>Cohort study</i> —If applicable, explain how loss to follow-up was addressed                                          |
| 15 |                        |    |                                                                                                                              |
| 16 |                        |    | <i>Case-control study</i> —If applicable, explain how matching of cases and controls was addressed                           |
| 17 |                        |    |                                                                                                                              |
| 18 |                        |    |                                                                                                                              |
| 19 |                        |    | <i>Cross-sectional study</i> —If applicable, describe analytical methods taking account of sampling strategy                 |
| 20 |                        |    |                                                                                                                              |
| 21 |                        |    |                                                                                                                              |
| 22 |                        |    |                                                                                                                              |
| 23 |                        |    | (e) Describe any sensitivity analyses                                                                                        |
| 24 |                        |    | 4                                                                                                                            |

Continued on next page

1  
2  
3  
4  
5  
6  
7  
8  
9  
10  
11  
12  
13  
14  
15  
16  
17  
18  
19  
20  
21  
22  
23  
24  
25  
26  
27  
28  
29  
30  
31  
32  
33  
34  
35  
36  
37  
38  
39  
40  
41  
42  
43  
44  
45  
46  
47  
48  
49  
50  
51  
52  
53  
54  
55  
56  
57  
58  
59  
60**Results**

|                          |         |                                                                                                                                                                                                              |     |
|--------------------------|---------|--------------------------------------------------------------------------------------------------------------------------------------------------------------------------------------------------------------|-----|
| Participants             | 13<br>* | (a) Report numbers of individuals at each stage of study—eg numbers potentially eligible, examined for eligibility, confirmed eligible, included in the study, completing follow-up, and analysed            | 5   |
|                          |         | (b) Give reasons for non-participation at each stage                                                                                                                                                         | n/a |
|                          |         | (c) Consider use of a flow diagram                                                                                                                                                                           | n/a |
| Descriptive data         | 14<br>* | (a) Give characteristics of study participants (eg demographic, clinical, social) and information on exposures and potential confounders                                                                     | 5   |
|                          |         | (b) Indicate number of participants with missing data for each variable of interest                                                                                                                          | n/a |
|                          |         | (c) <i>Cohort study</i> —Summarise follow-up time (eg, average and total amount)                                                                                                                             | n/a |
| Outcome data             | 15<br>* | <i>Cohort study</i> —Report numbers of outcome events or summary measures over time                                                                                                                          | 5   |
|                          |         | <i>Case-control study</i> —Report numbers in each exposure category, or summary measures of exposure                                                                                                         | n/a |
|                          |         | <i>Cross-sectional study</i> —Report numbers of outcome events or summary measures                                                                                                                           | n/a |
| Main results             | 16      | (a) Give unadjusted estimates and, if applicable, confounder-adjusted estimates and their precision (eg, 95% confidence interval). Make clear which confounders were adjusted for and why they were included | 5   |
|                          |         | (b) Report category boundaries when continuous variables were categorized                                                                                                                                    | 5   |
|                          |         | (c) If relevant, consider translating estimates of relative risk into absolute risk for a meaningful time period                                                                                             | n/a |
| Other analyses           | 17      | Report other analyses done—eg analyses of subgroups and interactions, and sensitivity analyses                                                                                                               | n/a |
| <b>Discussion</b>        |         |                                                                                                                                                                                                              |     |
| Key results              | 18      | Summarise key results with reference to study objectives                                                                                                                                                     | 5   |
| Limitations              | 19      | Discuss limitations of the study, taking into account sources of potential bias or imprecision. Discuss both direction and magnitude of any potential bias                                                   | 7   |
| Interpretation           | 20      | Give a cautious overall interpretation of results considering objectives, limitations, multiplicity of analyses, results from similar studies, and other relevant evidence                                   | 7   |
| Generalisability         | 21      | Discuss the generalisability (external validity) of the study results                                                                                                                                        | 7   |
| <b>Other information</b> |         |                                                                                                                                                                                                              |     |
| Funding                  | 22      | Give the source of funding and the role of the funders for the present study and, if applicable, for the original study on which the present article is based                                                | 8   |

1  
2  
3  
4 \*Give information separately for cases and controls in case-control studies and, if applicable, for exposed and  
5 unexposed groups in cohort and cross-sectional studies.  
6  
7  
8

9  
10 **Note:** An Explanation and Elaboration article discusses each checklist item and gives methodological background and  
11 published examples of transparent reporting. The STROBE checklist is best used in conjunction with this article (freely  
12 available on the Web sites of PLoS Medicine at <http://www.plosmedicine.org/>, Annals of Internal Medicine at  
13 <http://www.annals.org/>, and Epidemiology at <http://www.epidem.com/>). Information on the STROBE Initiative is  
14 available at [www.strobe-statement.org](http://www.strobe-statement.org).  
15  
16  
17  
18  
19  
20  
21  
22  
23  
24  
25  
26  
27  
28  
29  
30  
31  
32  
33  
34  
35  
36  
37  
38  
39  
40  
41  
42  
43  
44  
45  
46  
47  
48  
49  
50  
51  
52  
53  
54  
55  
56  
57  
58  
59  
60

For peer review only

# BMJ Open

## Predicting mortality in acute ischemic stroke treated with mechanical thrombectomy: Analysis of a multicenter prospective registry

|                                 |                                                                                                                                                                                                                                                                                                                                                                                                                                                                                                                                                                                                                                                                                                                                                                                                                                                                                                                                                                                                                                                                                                                                                                                                                 |
|---------------------------------|-----------------------------------------------------------------------------------------------------------------------------------------------------------------------------------------------------------------------------------------------------------------------------------------------------------------------------------------------------------------------------------------------------------------------------------------------------------------------------------------------------------------------------------------------------------------------------------------------------------------------------------------------------------------------------------------------------------------------------------------------------------------------------------------------------------------------------------------------------------------------------------------------------------------------------------------------------------------------------------------------------------------------------------------------------------------------------------------------------------------------------------------------------------------------------------------------------------------|
| Journal:                        | <i>BMJ Open</i>                                                                                                                                                                                                                                                                                                                                                                                                                                                                                                                                                                                                                                                                                                                                                                                                                                                                                                                                                                                                                                                                                                                                                                                                 |
| Manuscript ID                   | bmjopen-2020-043415.R1                                                                                                                                                                                                                                                                                                                                                                                                                                                                                                                                                                                                                                                                                                                                                                                                                                                                                                                                                                                                                                                                                                                                                                                          |
| Article Type:                   | Original research                                                                                                                                                                                                                                                                                                                                                                                                                                                                                                                                                                                                                                                                                                                                                                                                                                                                                                                                                                                                                                                                                                                                                                                               |
| Date Submitted by the Author:   | 09-Nov-2020                                                                                                                                                                                                                                                                                                                                                                                                                                                                                                                                                                                                                                                                                                                                                                                                                                                                                                                                                                                                                                                                                                                                                                                                     |
| Complete List of Authors:       | Li, Hao; Maoming People's Hospital, Neurology<br>Ye, Shisheng; Maoming People's Hospital, Neurology<br>Wu, Yuan-Ling ; Jinan University First Affiliated Hospital, Neurology<br>Huang, Sheng-Ming ; Jinan University First Affiliated Hospital, Neurology<br>Li, Yong-Xin ; Shunde Hospital of Southern Medical University<br>Lu, Kui ; Third People's Hospital of Zhongshan<br>Huang, Jing-Bo ; Maoming People's Hospital<br>Chen, Lve ; Shunde Hospital of Southern Medical University<br>Li, Hong-Zhuang ; Shunde Hospital of Southern Medical University<br>Wu, Wen-Jun ; Third People's Hospital of Zhongshan<br>Wu, Zhi-Lin ; Yunfu People's Hospital<br>Wu, Jian-Zhou ; Yunfu People's Hospital<br>Zhong, Wang-Tao ; Affiliated Hospital of Guangdong Medical University<br>Xian, Wen-Chuan ; Affiliated Hospital of Guangdong Medical University<br>Liao, Feng ; Affiliated Hospital of Guangdong Medical University<br>Tung, Tao-Hsin; Cheng-Hsin General Hospital,<br>Wu, Qiao-ling ; Maoming People's Hospital<br>Chen, Hai ; Maoming People's Hospital<br>Yuan, Li ; Maoming People's Hospital<br>Yang, Zhi; Maoming People's Hospital<br>Huang, Li-an ; Jinan University First Affiliated Hospital |
| <b>Primary Subject Heading</b>: | Neurology                                                                                                                                                                                                                                                                                                                                                                                                                                                                                                                                                                                                                                                                                                                                                                                                                                                                                                                                                                                                                                                                                                                                                                                                       |
| Secondary Subject Heading:      | Diagnostics, Radiology and imaging, Surgery                                                                                                                                                                                                                                                                                                                                                                                                                                                                                                                                                                                                                                                                                                                                                                                                                                                                                                                                                                                                                                                                                                                                                                     |
| Keywords:                       | Stroke medicine < INTERNAL MEDICINE, Vascular medicine < INTERNAL MEDICINE, Neuroradiology < NEUROLOGY, Stroke < NEUROLOGY, VASCULAR SURGERY                                                                                                                                                                                                                                                                                                                                                                                                                                                                                                                                                                                                                                                                                                                                                                                                                                                                                                                                                                                                                                                                    |
|                                 |                                                                                                                                                                                                                                                                                                                                                                                                                                                                                                                                                                                                                                                                                                                                                                                                                                                                                                                                                                                                                                                                                                                                                                                                                 |

SCHOLARONE™  
Manuscripts



I, the Submitting Author has the right to grant and does grant on behalf of all authors of the Work (as defined in the below author licence), an exclusive licence and/or a non-exclusive licence for contributions from authors who are: i) UK Crown employees; ii) where BMJ has agreed a CC-BY licence shall apply, and/or iii) in accordance with the terms applicable for US Federal Government officers or employees acting as part of their official duties; on a worldwide, perpetual, irrevocable, royalty-free basis to BMJ Publishing Group Ltd ("BMJ") its licensees and where the relevant Journal is co-owned by BMJ to the co-owners of the Journal, to publish the Work in this journal and any other BMJ products and to exploit all rights, as set out in our [licence](#).

The Submitting Author accepts and understands that any supply made under these terms is made by BMJ to the Submitting Author unless you are acting as an employee on behalf of your employer or a postgraduate student of an affiliated institution which is paying any applicable article publishing charge ("APC") for Open Access articles. Where the Submitting Author wishes to make the Work available on an Open Access basis (and intends to pay the relevant APC), the terms of reuse of such Open Access shall be governed by a Creative Commons licence – details of these licences and which [Creative Commons](#) licence will apply to this Work are set out in our licence referred to above.

Other than as permitted in any relevant BMJ Author's Self Archiving Policies, I confirm this Work has not been accepted for publication elsewhere, is not being considered for publication elsewhere and does not duplicate material already published. I confirm all authors consent to publication of this Work and authorise the granting of this licence.



1  
2  
3  
4  
5  
6  
7  
8  
9  
10  
11  
12  
13  
14  
15  
16  
17  
18  
19  
20  
21  
22  
23  
24  
25  
26  
27  
28  
29  
30  
31  
32  
33  
34  
35  
36  
37  
38  
39  
40  
41  
42  
43  
44  
45  
46  
47  
48  
49  
50  
51  
52  
53  
54  
55  
56  
57  
58  
59  
60

***Predicting mortality in acute ischemic stroke treated with mechanical thrombectomy: Analysis of a multicenter prospective registry***

Hao Li<sup>1,†</sup>, Shi-sheng Ye<sup>1,†</sup>, Yuan-ling Wu<sup>2</sup>, Sheng-ming Huang<sup>2</sup>, Yong-xin Li<sup>3</sup>, Kui Lu<sup>4</sup>, Jing-bo Huang<sup>1</sup>, Lve Chen<sup>3</sup>, Hong-zhuang Li<sup>3</sup>, Wen-jun Wu<sup>4</sup>, Zhi-lin Wu<sup>5</sup>, Jian-zhou Wu<sup>5</sup>, Wang-tao Zhong<sup>6</sup>, Wen-chuan Xian<sup>6</sup>, Feng Liao<sup>6</sup>, Tao-hsin Tung<sup>7</sup>, Qiao-ling Wu<sup>1</sup>, Hai Chen<sup>1</sup>, Li Yuan<sup>1</sup>, Zhi Yang<sup>1\*</sup>, Li-an Huang<sup>2\*</sup>

Corresponding Author:

Zhi Yang E-mail: [mmyangz@163.com](mailto:mmyangz@163.com); Li-an Huang E-mail: [huanglian1306@126.com](mailto:huanglian1306@126.com)

†Both authors contributed equally to this work.

Number of Tables: 3; Number of Figures: 1; Word count: 3105.

Keywords: acute ischemic stroke, mechanical thrombectomy, mortality, predictors, score

## Abstract

**Objectives:** We aimed to determine predictors of mortality within 90 days and develop a simple score for patients with mechanical thrombectomy(MT).

**Design:** Analysis of a multicenter prospective registry.

**Setting:** In six participating centers, acute ischemic stroke patients (AIS) treated by MT between March 2017 and May 2018 were documented prospectively.

**Participants:** 224 patients with AIS were treated by MT.

**Results:** Of 224 patients, 49 (21.9%) patients died, and 87 (38.8%) were independent. Variables associated with 90-day mortality were age, previous stroke, admission National Institutes of Health Stroke Scale (NIHSS), fasting blood glucose (FBG) and occlusion site. Logistic regression identified 4 variables independently associated with 90-day mortality: age $\geq$ 80 (OR 3.26, 95% CI 1.45-7.33), previous stroke (OR 2.33, 95% CI 1.04-5.21), admission NIHSS $\geq$ 18 (OR 2.37, 95% CI 1.13-4.99), and internal carotid artery (ICA) or basilar artery (BA) occlusion (OR 2.92, 95% CI 1.34-6.40). Using these data, we developed Predicting 90-days mortality of acute ischemic stroke with mechanical thrombectomy (PRACTICE) score ranging from 0 to 6 points. The receiver operator curve analysis found that PRACTICE score (area under the curve[AUC] = 0.744, 95% confidence interval [CI] 0.669-0.820) was numerically better than iScore (AUC =0.661, 95% CI 0.577-0.745) and PREMISE score (AUC =0.638, 95% CI 0.551-0.725) for predicting 90-day mortality.

**Conclusions:** We developed a simple score to estimate the 90-day mortality of AIS patients treated with MT. But the score needs to be prospectively validated.

### Strengths and limitations of this study

The study used multicenter prospective data from consecutively admitted ischemic stroke patients treated with mechanical thrombectomy.

Multivariate logistic regression analysis only used variables before the procedure, predicting 90-day mortality before mechanical thrombectomy.

The PRACTICE score was only validated in the primary dataset, and future external validation should be performed in another dataset.

The study was based on a retrospective analysis of a prospective observational registry.

## Introduction

Previous randomized controlled trials (RCTs) have demonstrated the overwhelming benefit of mechanical thrombectomy (MT) for acute ischemic stroke (AIS) due to emergent large vessel occlusion<sup>1-6</sup>. Although patients undergo MT as first-line therapy, the mortality within 90 days remains high: more than 30% in patients with acute basilar artery occlusion and approximately 15% in patients with large-vessel occlusion in the anterior circulation<sup>6,7</sup>. Previous studies have found predictors associated with mortality in ischemic stroke patients, such as age, diabetes mellitus, National Institute of Health Stroke Scale (NIHSS) score, vessel occlusion site, increased DWI lesional volume, passes with the thrombectomy device and use of rescue therapy<sup>7-11</sup>. The ability to predict mortality from information available prior to MT could be informative for patients and their family members. Such knowledge would impact on family members decision-making before MT and neurologists management decisions as well as medical care after MT. Unfortunately, a prognostic scoring system to predict mortality in patients undergoing MT has been less intensively addressed thus far. Many prognostic scoring system, such as Houston intra-arterial recanalization therapy (HIAT) score, HIAT2 score, Stanford Age and DWI (SAD) score and the totaled health risks in vascular events (THRIVE) score were developed to predict poor outcome<sup>8,11-13</sup>, but not for mortality specially. The iScore and PLAN score were developed for mortality prediction in acute ischemic stroke<sup>14,15</sup>. However, iScore and PLAN score were validated to predict outcomes in patients undergoing endovascular therapy due to anterior circulation large artery occlusion, showing moderate predictive accuracy (iScore AUC =0.76 and PLAN score AUC =0.73)<sup>16</sup>. Recently, the Predicting Early Mortality from Ischemic Stroke (PREMISE) score was developed to estimate early mortality of ischemic stroke patients treated at a stroke unit with good predictive accuracy (AUC =0.879)<sup>10</sup>. However, PREMISE score derived from nationwide Austrian Stroke Unit Registry, including a relatively small patients treated with MT, and the validation of PREMISE score in thrombectomy cohort has not been reported yet.

Overall, the prognostic scoring system to predict mortality of patients with MT remain lacking, and it is critical to avoid futile MT by predicting mortality from clinical and imaging information available prior to MT. Our study aimed to determine predictors of mortality within 90 days, develop a simple scoring instrument for patients with MT and compared the predictive power with the previous prognostic tools (iScore, PREMISE score) in a multicenter prospective registry study for endovascular treatment of acute ischemic stroke (ET-AIS).

## Method

### Patients Selection

Three hundred and three consecutive patients presenting with acute ischemic stroke treated by endovascular treatment (EVT) were registered in the ET-AIS registry during March 2017 and May 2018. ET-AIS was a multicenter, prospective and observational registry study involving six comprehensive stroke centers in China. In our study, six comprehensive stroke centers were divided into low volume center (Zhongshan People's Hospital, Yunfu People's Hospital, Affiliated Hospital of Guangdong Medical University), medium volume center (First Affiliated Hospital of Jinan University, Shunde Hospital of Southern Medical University) and high volume center (Maoming People's Hospital) according to the number of patients included in ET-AIS registry. Low, medium and high volume center were defined as number of included patients <50,  $50 \leq$  included patients <100, and included patients  $\geq 100$ . Patients receiving intravenous thrombolysis (IVT) prior to EVT were acceptable, consistent with current guidelines<sup>17</sup>. The registry study protocol was approved by the ethics committee of each participating center, including ethics committee of First Affiliated Hospital of Jinan University, ethics committee of Maoming People's Hospital, ethics committee of Shunde Hospital of Southern Medical University, ethics committee of Zhongshan People's Hospital, ethics committee of Yunfu People's Hospital and ethics committee of Affiliated Hospital of Guangdong Medical University, and registered on the Chinese Clinical Trial Registry (<http://www.chictr.org.cn>; ChiCTR-OOC-17013052). All consecutive patients with the following criteria were included: (1) age 18 years or older; (2) diagnosis of an AIS with proven large vessel occlusion confirmed by digital subtraction angiography (DSA); (3) treatment with or without intravenous thrombolysis prior to MT; and (4) treated with MT within 12 hours of symptom onset. Patients with prestroke functional dependence (modified Rankin

Scale [MRS] score >2), only intracranial large vascular stenosis, only anterior cerebral artery (ACA) occlusion, only posterior cerebral artery (PCA) or vertebral artery (VA) occlusion were excluded.

### Study Variables and Outcome Definition

All data, including baseline characteristics, procedure details and outcome, were recorded on case report forms (CRFs). Patient demographics included age and gender. The main vascular risk factors included smoking (defined as self-reports of cigarette smoking in the past, or currently), hypertension, diabetes mellitus, coronary artery disease, atrial fibrillation, and previous stroke. A history of hypertension, diabetes mellitus, coronary artery disease, and atrial fibrillation was based on documentation at admission and did not include a new diagnosis made during incident hospitalization. Laboratorial tests included admission fasting plasma glucose (FPG) and admission low-density lipoprotein cholesterol (LDL-C). Clinical and radiological data included the admission National Institute of Health Stroke Scale (NIHSS) score, Alberta Stroke Program Early CT Score (ASPECTS) on noncontrast computed tomography (CT), occlusion site, Trial of ORG 10172 in the Acute Stroke Treatment (TOAST) classification, preprocedure modified thrombolysis in cerebral infarction [m-TICI] score and time from onset to groin puncture. Procedure details included intravenous thrombolysis (IVT) prior to the procedure, methods of anesthesia, stenting (extracranial stenting and/or intracranial stenting), procedure-related complications. Outcomes included successful recanalization (defined as postprocedure m-TICI  $\geq 2b$ ), intracranial hemorrhage within 24 hours post-MT, 90-day favorable outcome (defined as MRS  $\leq 2$ ), and 90-day mortality (defined as MRS = 6). Intracranial hemorrhage (ICH) was defined by the Heidelberg Bleeding Classification and classified into symptomatic intracranial hemorrhage (SICH) and asymptomatic intracranial hemorrhage (aSICH)<sup>18</sup>. SICH confirmed by the 24 hours follow-up head CT or magnetic resonance imaging (MRI) with a  $\geq 4$  point NIHSS score increase according to the Heidelberg criteria. A follow-up was performed at 90 days by neurological physicians or trained research nurses during face-to-face interviews or via telephone conversations with the patient, their relatives, or their general practitioner. More details of variables and outcomes definition are shown in supplementary material.

### Endovascular Procedures

Before entry into the neuroangiography suite, all patients or legally authorized representatives signed informed consent forms. All procedures were performed under general anesthesia or conscious sedation. The major revascularization method was MT using a stent retriever or direct aspiration at the operator's discretion. If underlying intracranial atherosclerotic stenosis (ICAS) was detected, balloon angioplasty or stenting was performed when considered necessary. Intra-arterial thrombolysis was allowed as adjuvant therapy for some patients. Recanalization status was quantified by using the m-TICI score based on the final angiogram, and successful recanalization was defined as a m-TICI score  $\geq 2b$ <sup>19</sup>. All patients underwent head CT scan or MRI within 24 hours after the procedure to assess hemorrhagic complications. Specific endovascular procedures and preoperative anesthesia methods were chosen by operators at each center. For postoperative antithrombotic drugs, antiplatelet drugs or anticoagulants were selected depending on the stroke etiology.

### Calculation of iScore and PREMISE Score

The iScore has 30-Day and 1-Year version, and we use the 30-day version in this study, which derived from age (1 point for per year), sex (10 points for male), stroke severity (105 points for Canadian Neurological Scale (CNS) = 0, 65 points for CNS  $\leq 4$ , 40 points for CNS = 5-7 and 0 point for CNS  $\geq 8$ ), stroke subtype (0 point for lacunar, 30 points for nonlacunar and 35 points for undetermined origin), risk factor (10 points for atrial fibrillation and congestive heart failure respectively), comorbid condition (10 points for cancer and 35 points for renal dialysis), preadmission disability (15 points for dependent), and glucose on admission (15 points for  $\geq 135$  mg/dl)<sup>14</sup>. In ET-AIS registry, stroke severity was assessed on admission by using the NIHSS, which could be converted to CNS score according to the following conversion: a CNS score of 1 to 4 equals an NIHSS score of 14 to 22, a CNS score of 5 to 7 equals an NIHSS score of 9 to 13, a CNS score of  $\geq 8$  equals an NIHSS score of  $\leq 8$ , and a CNS score of 0 equals an NIHSS score of  $> 22$ <sup>20</sup>.

The PREMISE score with a total score of 12 was calculated on the basis of age (1 point for 60-69 years and 2 point for  $\geq 70$  years), stroke severity (2 points for NIHSS score 5-11, 4 points for NIHSS score 12-23, 5 points for NIHSS score  $\geq 24$ ), prestroke functional disability (1 point for MRS scores 1-5),

preexisting heart disease(1 point for yes), diabetes mellitus(1 point for yes), posterior circulation stroke syndrome(1 point for yes), and nonlacunar stroke cause(1 point for yes)<sup>10</sup>.

### Statistical Analysis and Score Development

Statistical analyses were performed using SPSS 25.0 (SPSS, Chicago, IL, USA). A *P* value <0.05 was considered statistically significant (2-sided). Continuous variables are reported as the means ± standard deviation or medians (interquartile range [IQR]), and categorical variables are reported as frequencies. Comparisons were performed on mortality and survival using the Pearson chi-square test, independent-samples *t* test, and Mann-Whitney *U* test. To account for multiple testing, the significance level was set at *P*<0.05. Multivariate logistic regression analysis was performed to determine independent predictors for 90-day mortality. We tested the association of procedure-related variables with mortality; however, because the primary goal of the study was predicting mortality before the procedure, these variables were not used in the multivariate model.

The PRACTICE score was developed based on variables that were independently associated with 90-day mortality in multivariate analysis. By rounding to the next positive integer value, the score point could be defined according to the value of the  $\beta$ -coefficient, and the total risk score could be calculated by summing all the components of the score. The threshold values of the PRACTICE score were determined by using a receiver operating characteristic (ROC) curve and its sensitivity and specificity to evaluate the authenticity and accuracy of the PRACTICE score. We also validated the iScore and PREMISE score in our registry, comparing the predictive power with PRACTICE score. Model calibration was assessed using the Hosmer-Lemeshow goodness-of-fit test.

### Patient and Public Involvement

Patients and/or the public were not involved in the design, or conduct, or reporting, or dissemination plans of this research.

### Results

During the study period, a total of 303 patients with AIS were treated by endovascular recanalization in six participating centers. Of these, 79 patients were excluded from the present study analysis for the following reasons: lost to follow-up at 90 days (*n*=12), only stenosis (*n*=54), ACA occlusion (*n*=5), PCA occlusion (*n*=3), and VA occlusion (*n*=5). A total of 224 patients finally met the study inclusion criteria. The mean age was 67.08±12.94 years, and 39.7% were female. Procedure-related complications occurred in 77 patients (34.3%), including vasospasm (*n*=33), stent thrombosis (*n*=4), dissection (*n*=8), new vessel occlusion (*n*=29), and subarachnoid hemorrhage (SAH) caused by vascular perforation (*n*=3). ICH occurred in 25 patients, among whom 8 (3.6%) were symptomatic. At the 90-day follow-up, 49 (21.9%) patients had died, and 87 (38.8%) were independent (90-day MRS ≤2).

The mortality group had a significantly higher prevalence of age≥80 (*P*<0.001), previous stroke (*P*=0.049), admission NIHSS score≥18 (*P*<0.001), FPG >150 mg/dl (*P*=0.023), and ICA or BA occlusion (*P*=0.001) than the survival group had (Table 1). There was no significant difference in the use of IVT, general anesthesia, stenting, procedure-related complications, recanalization or ICH between the mortality group and the survival group. In a multivariate logistic regression analysis (Table 2), age≥80 (adjusted odds ratio, 3.26; 95% CI, 1.45-7.33; *P*=0.004), previous stroke (adjusted odds ratio, 2.33; 95% CI, 1.04-5.21; *P*=0.040), admission NIHSS score≥18 (adjusted odds ratio, 2.37; 95% CI, 1.13-4.99; *P*=0.023), and ICA or BA occlusion (adjusted odds ratio, 2.92; 95% CI, 1.34-6.40; *P*=0.007) remained independently associated with a higher risk of 90-day mortality. Calibration of the model was good (Hosmer-Lemeshow goodness-of-fit *P*=0.77).

All variables positively associated with early stroke mortality in the multivariate model were subsequently used to develop the PRACTICE score, which is shown in Table 3. The AUC of the PRACTICE score was 0.744 (95% CI 0.669-0.820, *P*<0.001), which suggested moderate diagnostic value for the prediction of 90-day mortality (Figure 1). In terms of the cut-off value, ≥2.5 had a sensitivity of 69%, specificity of 67%, positive predictive value of 37%, and negative predictive value of 89% for predicting 90-day mortality. Furthermore, PRACTICE score had better prediction power than iScore (AUC =0.661, 95% CI 0.577-0.745) and PREMISE score (AUC =0.638, 95% CI 0.551-0.725) for predicting 90-day mortality.

### Discussion

1  
2  
3 In our study, we used data from a multicenter prospective registry to identify pretreatment risk factors  
4 for 90-day mortality of AIS treated with MT. The score consists of 4 clinical and imaging variables: age,  
5 previous stroke, admission NIHSS and occlusion site, which can explain 69% of 90-day mortality and  
6 may provide useful information in the process of decision-making before MT.

7 Other studies to find predictors of outcome among patients undergoing endovascular treatment have  
8 been conducted. The earliest prediction model for the poor outcome of AIS with endovascular treatment  
9 is the Houston intra-arterial recanalization therapy (HIAT) score developed in 2009<sup>12</sup>. The HIAT score  
10 involves age >75 years, NIHSS >18 and admission glucose >150 mg/dl, with a total score of 3. The  
11 increasing HIAT scores revealed an increase in the rate of poor outcome on hospital discharge. The  
12 HIAT score is entirely based on clinical variables. However, there are a number of imaging factors that  
13 may correlate with outcome after endovascular treatment. The HIAT2 score is the optimized version of  
14 the HIAT score by inclusion of ASPECTS, which more accurately predicts poor outcome after intra-  
15 arterial recanalization therapy in anterior circulation occlusions<sup>13</sup>. The Stanford Age and DWI (SAD)  
16 score, a score encompassing age and diffusion-weighted imaging lesion volume<sup>11</sup>, showed only a slightly  
17 better predictive accuracy than the HIAT score in the validation cohort (AUC for SAD = 0.69; HIAT =  
18 0.66). Therefore, the HIAT2 and SAD scores suggest that the addition of imaging variables to a clinical  
19 prediction scoring system may enhance the ability to predict a poor outcome following endovascular  
20 treatment. However, no model seems suitable for making individual patient decisions because of their  
21 modest AUC values. In addition, the above mentioned score focused on poor outcome (MRS 4-6 points),  
22 not worst outcome/mortality. The totaled health risks in vascular events (THRIVE) incorporate history  
23 of hypertension, history of atrial fibrillation, DM, age, and stroke severity, and this assessment strongly  
24 predicts mortality at 90 days (ROC AUC=0.709)<sup>8</sup>. However, the THRIVE score only consists of clinical  
25 variables and lacks imaging variables that could contribute to mortality.

26 The score variables of iScore and PLAN score were easy-to-collect clinical parameters and comorbid  
27 conditions, which were available at the time of admission and may be determined by nonspecialist  
28 clinicians. But in the our registry, the detail of neurologic deficit (each item of NIHSS score) was not  
29 performed systematically, so the variable were not available on all patients and PLAN score was not  
30 included in the analysis. Xiaopeng Chu et al<sup>16</sup> validated iScore and PLAN score in AIS with anterior  
31 circulation large vessel occlusion undergoing MT in Chinese, and found that iScore is a more valid  
32 predictive tool. In our study, PRACTICE score performed better than iScore (AUC = 0.744 VS AUC  
33 =0.661). The PREMISE score showed a low predictive power (AUC=0.638) for predicting 90-day  
34 mortality in our study. It is possible that PREMISE score was more suitable for predicting early ( $\leq 7$   
35 days poststroke) mortality of patients admitted with ischemic stroke treated with medical treatment.

36 Our work is in agreement with previous research that has identified the occlusion site of the internal  
37 carotid artery/basilar artery as an independent predictor of 90-day mortality<sup>7</sup>. In that study, successfully  
38 recanalized patients had lower mortality (25.2% versus 46.9%,  $P<0.001$ ). In our study, the survival  
39 group had higher rates of successful recanalization than the mortality group, but the difference was not  
40 statistically significant. In particular, a multiple regression analysis of the North American Solitaire  
41 Acute Stroke (NASA) registry showed that occlusion sites of the internal carotid artery or basilar artery  
42 carry a worse prognosis than middle cerebral artery (MCA) occlusions despite successful  
43 recanalization<sup>21</sup>. Another study examined patients with acute occlusion of the distal ICA treated with  
44 IAT or IV rt-PA, and the mortality rate was 50% despite complete recanalization<sup>22</sup>. Although basilar  
45 occlusion accounts for approximately 5–10% of all proximal intracranial occlusions, the mortality is  
46 higher than that in patients with large vessel occlusion of the anterior circulation<sup>6,7</sup>. This correlation may  
47 be the result of a high lesion volume with proximal arterial occlusion, which is an independent predictor  
48 of 90-day mortality<sup>11,23</sup>.

49 High NIHSS on admission has previously been correlated with poor outcomes or mortality after  
50 endovascular treatment by several studies<sup>3,7-10</sup>. In the present study, we determined a cut-off value of 18,  
51 which was predictive of 90-day mortality. Patients who present with a high NIHSS have even poorer  
52 outcomes with intravenous therapy or medical management compared with endovascular treatment<sup>3</sup>.

53 Age has previously been associated with poor outcome in patients treated with intravenous therapy and  
54 endovascular treatment<sup>10-13,24</sup>. In our study, age  $\geq 80$  years was a significant independent predictor of 90-  
55 day mortality and scored two points in the model. Very recently, an analysis of German Stroke Registry–  
56 Endovascular Treatment (GSR-ET) showed that patients aged  $\geq 90$  years have higher mortality for  
57  
58  
59  
60

1  
2  
3 thrombectomy<sup>25</sup>. Decision-making for thrombectomy in patients aged  $\geq 90$  years should be premised on  
4 a case-by-case basis with regard to admission NIHSS and ASPECT scores.

5 PRACTICE score has only moderate predictive power (AUC=0.74) for predicting mortality, which  
6 seems unsuitable for making decision to proceed to MT. However, the MT decision should be made  
7 individually based on clinical judgment and family discussion. Until prospective data from randomized  
8 trials are available, the PRACTICE score could be useful to provide valuable prognostic data and to  
9 adjust expectations of outcome before MT.

### 10 **Limitations**

11 This study has several limitations. Firstly, the study was based on a retrospective analysis of a  
12 prospective observational registry, and PRACTICE score needs to be validated prospectively in another  
13 dataset. Secondly, the imaging assessments were not adjudicated by a core laboratory, which could  
14 introduce a bias in estimates. Thirdly, potential Berkson's bias (selection bias) was inevitable due to the  
15 hospital-based study design. This population was not only exactly representative of the whole general  
16 population, but it was also difficult to estimate the mortality of a matched total population sample in  
17 China, preferably in the region of Guangdong. Fourthly, some of the clinical variables obtained from  
18 medical records could have resulted in misclassification bias. Nevertheless, it seems reasonable to  
19 assume that if misclassification bias was present, it was not related to all-cause mortality, thus could be  
20 viewed as nondifferential misclassification. Finally, the small sample size limited stratified analysis of  
21 predictor for insufficient statistical power, such as age and NIHSS score.

### 22 **Conclusion**

23 In summary, a prediction score based on age, previous stroke, admission NIHSS and occlusion site  
24 predicted 90-day mortality following MT with moderate accuracy. This score may provide useful  
25 information in the process of decision-making before MT. But the score needs to be prospectively  
26 validated.  
27  
28

### 29 **Author affiliations**

30  
31 <sup>1</sup> Department of Neurology, Maoming People's Hospital, Maoming, Guangdong, China.

32  
33 <sup>2</sup> Department of Neurology, First Affiliated Hospital of Jinan University, Guangzhou, Guangdong,  
34 China.

35  
36 <sup>3</sup> Department of Neurology, Shunde Hospital of Southern Medical University, Foshan, Guangdong,  
37 China.

38  
39 <sup>4</sup> Department of Neurology, Zhongshan People's Hospital, Zhongshan, Guangdong, China.

40  
41 <sup>5</sup> Department of Neurology, Yunfu People's Hospital, Yunfu, Guangdong, China.

42  
43 <sup>6</sup> Department of Neurology, Affiliated Hospital of Guangdong Medical University, Zhanjiang, Guang-  
44 dong, China.

45  
46 <sup>7</sup> Department of Medicinal Research and Education, Cheng-Hsin General Hospital, Taipei, Taiwan,  
47 China.  
48  
49  
50  
51  
52  
53  
54  
55  
56  
57  
58  
59  
60

1  
2  
3 **Acknowledgement** : We thank all ET-AIS registry collaborators.  
4

5 **Author Contributions**  
6

7 Zhi Yang and Li'an Huang organized this research. Hao Li and Shi-sheng Ye were mainly responsible  
8 for collecting data, data proofreading, data statistical analysis and writing the paper. All the authors  
9 participated in the initiation of the research project and the design of the research contents. The research  
10 plan and paper case report form (CRF) were written by Zhi Yang, Li'an Huang, Hong-zhuang Li, Wen-  
11 jun Wu, Zhi-lin Wu and Wang-tao Zhong. Yuan-ling Wu, Sheng-ming Huang, Hao Li, Shi-sheng Ye,  
12 Yong-xin Li, Kui Lu, Jing-bo Huang, Qiao-ling Wu, Hai Chen, Li Yuan, Lve Chen, Jian-zhou Wu,  
13 Wen-chuan Xian and Feng Liao were mainly responsible for the collection of cases in each center,  
14 completion of the paper CRF and the registration of data on the eCRF registration website. Tao-hsin  
15 Tung assisted with analysis of data and manuscript revision. All authors have read and approved the  
16 final manuscript.  
17  
18  
19  
20  
21  
22

23 **Statement of Ethics**  
24

25 The registry study protocol was approved by the ethics committee of First Affiliated Hospital of Jinan  
26 University (ID:2017007), ethics committee of Maoming People's Hospital, ethics committee of Shunde  
27 Hospital of Southern Medical University, ethics committee of Zhongshan People's Hospital, ethics  
28 committee of Yunfu People's Hospital and ethics committee of Affiliated Hospital of Guangdong  
29 Medical University.  
30  
31  
32

33 **Conflict of Interest Statement**  
34

35 None declared.  
36  
37

38 **Funding Sources**  
39

40 This study was supported by Guangdong Natural Fund Project (No: 32218145), High-level Hospital  
41 Construction Research Project of Maoming People's Hospital and The Science and Technology Plan  
42 Project of Maoming (No: 2017004).  
43  
44

45 **Data sharing statement** : The data that support the findings of this study are available from the  
46 corresponding author upon reasonable request.  
47  
48  
49  
50  
51  
52  
53  
54  
55  
56  
57  
58  
59  
60



## References

- 1 Campbell BC, Mitchell PJ, Kleinig TJ, et al. Endovascular therapy for ischemic stroke with perfusion-imaging selection. *N Engl J Med*. 2015;372:1009-18.
- 2 Saver JL, Goyal M, Bonafe A, et al. Stent-retriever thrombectomy after intravenous t-PA vs. t-PA alone in stroke. *N Engl J Med*. 2015;372:2285-95.
- 3 Goyal M, Demchuk AM, Menon BK, et al. Randomized assessment of rapid endovascular treatment of ischemic stroke. *N Engl J Med*. 2015;372:1019-30.
- 4 Berkhemer OA, Fransen PS, Beumer D, et al. A randomized trial of intraarterial treatment for acute ischemic stroke. *N Engl J Med*. 2015;372:11-20.
- 5 Jovin TG, Chamorro A, Cobo E, et al. Thrombectomy within 8 hours after symptom onset in ischemic stroke. *N Engl J Med*. 2015;372:2296-306.
- 6 Liu X, Dai Q, Ye R, et al. Endovascular treatment versus standard medical treatment for vertebrobasilar artery occlusion (BEST): an open-label, randomised controlled trial. *Lancet Neurol*. 2020;19:115-22.
- 7 Linfante I, Walker GR, Castonguay AC, et al. Predictors of Mortality in Acute Ischemic Stroke Intervention: Analysis of the North American Solitaire Acute Stroke Registry. *Stroke*. 2015;46:2305-8.
- 8 Flint AC, Cullen SP, Faigeles BS, et al. Predicting long-term outcome after endovascular stroke treatment: the totaled health risks in vascular events score. *AJNR American journal of neuroradiology*. 2010;31:1192-6.
- 9 Gory B, Mazighi M, Labreuche J, et al. Predictors for Mortality after Mechanical Thrombectomy of Acute Basilar Artery Occlusion. *Cerebrovasc Dis*. 2018;45:61-67.
- 10 Gatttringer T, Posekany A, Niederkorn K, et al. Predicting Early Mortality of Acute Ischemic Stroke. *Stroke*. 2019;50:349-56.
- 11 Liggins JT, Yoo AJ, Mishra NK, et al. A score based on age and DWI volume predicts poor outcome following endovascular treatment for acute ischemic stroke. *International journal of stroke : official journal of the International Stroke Society*. 2015;10:705-9.
- 12 Hallevi H, Barreto AD, Liebeskind DS, et al. Identifying patients at high risk for poor outcome after intra-arterial therapy for acute ischemic stroke. *Stroke*. 2009;40:1780-5.
- 13 Sarraj A, Albright K, Barreto AD, et al. Optimizing prediction scores for poor outcome after intra-arterial therapy in anterior circulation acute ischemic stroke. *Stroke*. 2013;44:3324-30.
- 14 Saposnik G, Kapral M, Liu Y, et al. Iscore: A risk score to predict death early after hospitalization for an acute ischemic stroke. *Circulation*. 2011;123:739-49.
- 15 O'Donnell M, Fang J, D'Uva C, et al. The plan score: A bedside prediction rule for death and severe disability following acute ischemic stroke. *Archives of internal medicine*. 2012;172:1548-56.
- 16 Chu X, Yang Y, Zhang F, et al. Validation of iscore and plan score for death in thrombectomy in acute stroke due to anterior circulation large artery occlusion. *Journal of stroke and cerebrovascular diseases : the official journal of National Stroke Association*. 2018;27:3261-5.
- 17 W. J. Powers, A. A. Rabinstein, T. Ackerson, et al. 2018 Guidelines for the Early Management of Patients With Acute Ischemic Stroke: A Guideline for Healthcare Professionals From the American Heart Association/American Stroke Association. *Stroke*. 2018 Mar;49:e46-e110.

- 1  
2  
3 18 von Kummer R, Broderick JP, Campbell BC, et al. The Heidelberg Bleeding Classification:  
4 Classification of Bleeding Events After Ischemic Stroke and Reperfusion Therapy. *Stroke*.  
5 2015;46:2981-6.  
6  
7 19 Zaidat OO, Yoo AJ, Khatri P, et al. Recommendations on angiographic revascularization grading  
8 standards for acute ischemic stroke: a consensus statement. *Stroke*. 2013;44:2650-63.  
9  
10 20 Nilanont Y, Komoltri C, Saposnik G, et al. The canadian neurological scale and the nihss:  
11 Development and validation of a simple conversion model. *Cerebrovascular diseases (Basel,*  
12 *Switzerland)*. 2010;30:120-6.  
13  
14 21 Linfante I, Starosciak AK, Walker GR, et al. Predictors of poor outcome despite recanalization: a  
15 multiple regression analysis of the NASA registry. *Journal of neurointerventional surgery*.  
16 2016;8:224-9.  
17  
18 22 Zaidat OO, Suarez JI, Santillan C, et al. Response to intra-arterial and combined intravenous and  
19 intra-arterial thrombolytic therapy in patients with distal internal carotid artery occlusion. *Stroke*.  
20 2002;33:1821-6.  
21  
22 23 Panni P, Gory B, Xie Y, et al. Acute Stroke With Large Ischemic Core Treated by Thrombectomy.  
23 *Stroke*. 2019;50:1164-71.  
24  
25 24 Tissue plasminogen activator for acute ischemic stroke. *N Engl J Med*. 1995;333:1581-7.  
26  
27 25 Meyer L, Alexandrou M, Flottmann F, et al. Endovascular Treatment of Very Elderly Patients  
28 Aged  $\geq 90$  With Acute Ischemic Stroke. *J Am Heart Assoc*. 2020;9:e014447.  
29  
30  
31  
32  
33  
34  
35  
36  
37  
38  
39  
40  
41  
42  
43  
44  
45  
46  
47  
48  
49  
50  
51  
52  
53  
54  
55  
56  
57  
58  
59  
60

Table 1. Bivariate Analysis for 90-Day Mortality

| Variables                                                     | Mortality<br>N=49 | Survival<br>N=175 | P Value         |
|---------------------------------------------------------------|-------------------|-------------------|-----------------|
| ≥80, n (%)                                                    | 18 (36.7%)        | 25 (14.3%)        | <i>P</i> <0.001 |
| Male sex, n (%)                                               | 31 (63.3%)        | 104 (59.4%)       | <i>P</i> =0.628 |
| Smoking, n (%)                                                | 12 (24.5%)        | 46 (26.3%)        | <i>P</i> =0.800 |
| Hypertension, n (%)                                           | 27 (55.1%)        | 80 (45.7%)        | <i>P</i> =0.245 |
| Diabetes, n (%)                                               | 12 (24.5%)        | 28 (16.0%)        | <i>P</i> =0.170 |
| Atrial fibrillation, n (%)                                    | 18 (36.7%)        | 54 (30.9%)        | <i>P</i> =0.436 |
| Coronary artery disease, n (%)                                | 9 (18.4%)         | 17 (9.7%)         | <i>P</i> =0.095 |
| Previous stroke, n (%)                                        | 16 (32.7%)        | 34 (19.4%)        | <i>P</i> =0.049 |
| TOAST classification, n (%)                                   |                   |                   | <i>P</i> =0.902 |
| Large artery atherosclerosis, n (%)                           | 18 (36.7%)        | 68 (38.9%)        |                 |
| Cardioembolism, n (%)                                         | 21 (42.9%)        | 79 (45.1%)        |                 |
| Others, n (%)                                                 | 10 (20.4%)        | 28 (16.0%)        |                 |
| Admission NIHSS score≥18, n (%)                               | 33 (67.3%)        | 66 (37.7%)        | <i>P</i> <0.001 |
| FPG >150 mg/dl                                                | 22 (47.8%)        | 50 (29.9%)        | <i>P</i> =0.023 |
| LDL-C>160 mg/dl                                               | 12 (26.7%)        | 31 (18.6%)        | <i>P</i> =0.230 |
| Time from onset to groin puncture                             |                   |                   | <i>P</i> =0.611 |
| <6.0 hours, n (%)                                             | 27 (55.1%)        | 110 (62.9%)       |                 |
| 6.0-12.0 hours, n (%)                                         | 19 (38.8%)        | 57 (32.6%)        |                 |
| ≥12 hours, n (%)                                              | 3 (6.1%)          | 8 (4.6%)          |                 |
| ASPECTS≥6, n (%)                                              | 30 (88.2%)        | 148 (94.9%)       | <i>P</i> =0.233 |
| Occlusion site, n (%)                                         |                   |                   | <i>P</i> =0.001 |
| MCA, n (%)                                                    | 13 (26.5%)        | 92 (52.6%)        |                 |
| ICA/BA, n (%)                                                 | 36 (73.5%)        | 83 (47.4%)        |                 |
| Use of IVT, n (%)                                             | 19 (38.8%)        | 67 (38.3%)        | <i>P</i> =0.950 |
| General anesthesia                                            | 6 (12.0%)         | 27 (15.4%)        | <i>P</i> =0.143 |
| Stenting (extracranial stenting and/or intracranial stenting) | 21 (41.2%)        | 69 (38.8%)        | <i>P</i> =0.756 |
| Procedure-related complications                               |                   |                   | <i>P</i> =0.605 |
| Vasospasm                                                     | 5 (10.4%)         | 28 (16.1%)        |                 |
| Stent thrombosis                                              | 0 (0%)            | 4 (2.3%)          |                 |
| Dissection                                                    | 2 (4.2%)          | 6 (3.4%)          |                 |
| Embolism in a new territory                                   | 9 (18.8%)         | 20 (11.5%)        |                 |
| SAH caused by vascular perforation                            | 1 (2.1%)          | 2 (1.1%)          |                 |
| Recanalization (postprocedure mTICI≥2b)                       | 44 (86.3%)        | 157 (89.7%)       | <i>P</i> =0.491 |
| ICH                                                           |                   |                   | <i>P</i> =0.915 |
| SICH                                                          | 3(4.1%)           | 5 (2.9%)          |                 |
| aSICH                                                         | 6 (12.2%)         | 11 (6.3%)         |                 |

TOAST: Trial of ORG 10172 in the Acute Stroke Treatment; FPG: fasting plasma glucose; LDL-C: low-density lipoprotein cholesterol; ASPECTS: Alberta Stroke Program Early CT Score; MCA: middle cerebral artery; ICA: internal carotid artery; BA:basilar artery; IVT: intravenous thrombolysis; SAH: subarachnoid hemorrhage; mTICI: modified thrombolysis in cerebral infarction; ICH: intracranial hemorrhage; SICH: symptomatic intracranial hemorrhage; aSICH: asymptomatic intracranial hemorrhage.

Table 2. Multivariate Logistic Regression Model Including Variables Associated with 90-Day Mortality

| Variables                       | $\beta$   | OR (95% CI)      | <i>P</i> Value  |
|---------------------------------|-----------|------------------|-----------------|
| Age $\geq$ 80                   | 1.181     | 3.26 (1.45-7.33) | <i>P</i> =0.004 |
| Previous stroke                 | 0.844     | 2.33 (1.04-5.21) | <i>P</i> =0.040 |
| Admission NIHSS score $\geq$ 18 | 0.863     | 2.37 (1.13-4.99) | <i>P</i> =0.023 |
| FPG > 150 mg/dl                 | 0.646     | 1.91 (0.92-3.97) | <i>P</i> =0.084 |
| Occlusion site                  |           |                  |                 |
| MCA                             | Reference | Reference        | Reference       |
| ICA/BA                          | 1.072     | 2.92 (1.34-6.40) | <i>P</i> =0.007 |

FPG: fasting plasma glucose; MCA: middle cerebral artery; ICA: internal carotid artery; BA:basilar artery.

Table 3. Predicting 90-Day Mortality of AIS with MT (PRACTICE)

| Risk factors for 90-day mortality | Points |
|-----------------------------------|--------|
| Age $\geq$ 80                     | 2      |
| Previous stroke                   | 1      |
| ICA/BA occlusion                  | 2      |
| Admission NIHSS $\geq$ 18         | 1      |
| Maximal score points              | 6      |

ICA: internal carotid artery; BA:basilar artery.

### Figure legend

Figure 1. Comparison of PRACTICE with iScore and PREMISE score by ROC curve analysis.

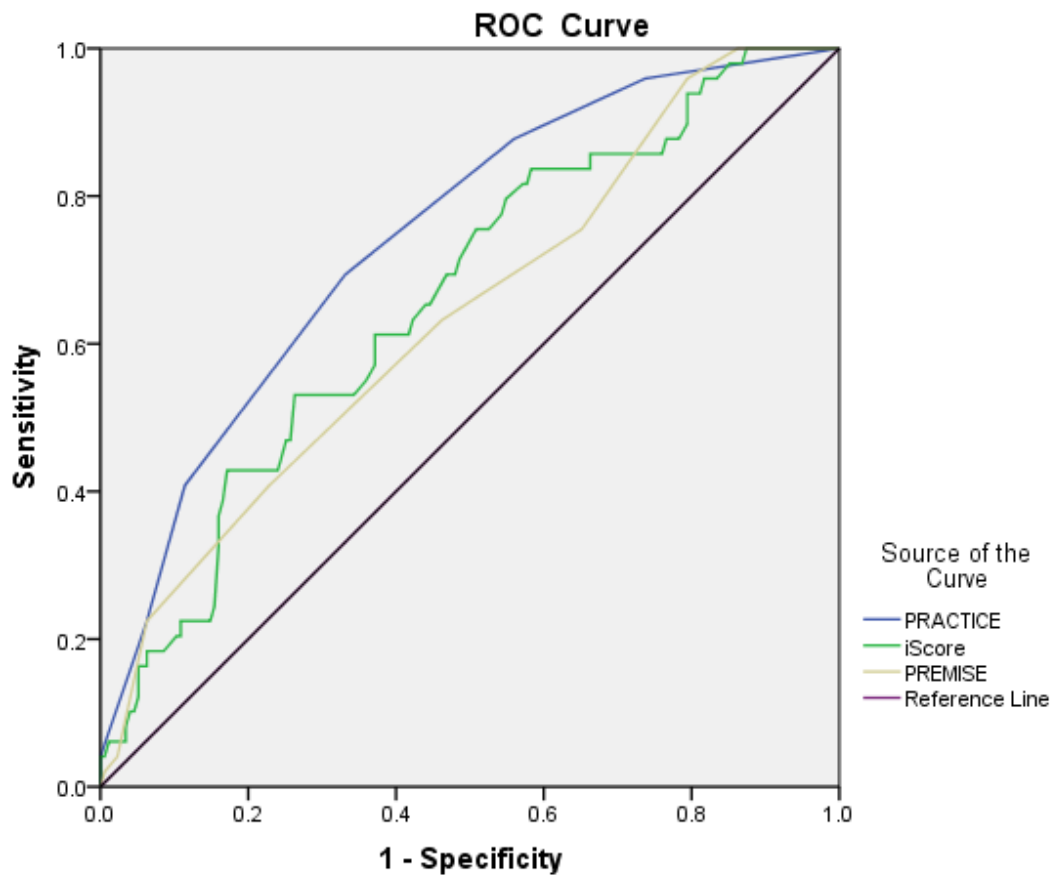

Figure 1. Comparison of PRACTICE with iScore and PREMISE score by ROC curve analysis.

### List of study variables and outcomes definition

**Smoking:** defined as self-reports of cigarette smoking in the past, or currently.

**Diabetes mellitus:** defined as self-reports of diabetes mellitus or taking oral antidiabetic agents or injecting insulin.

**Hypertension:** defined as self-reports of hypertension, taking antihypertensive agents.

**Atrial fibrillation:** defined as self-reports of atrial fibrillation, taking or not taking anticoagulant agents.

**Coronary artery disease:** defined as self-reports of Coronary artery disease.

**Previous stroke:** defined as self-reports of stroke, including hemorrhagic and ischemic stroke.

**TOAST classification:** assessed by MRI, MRA and CTA based on Trial of Org 10172 in Acute Stroke Treatment (TOAST) criteria [1].

**Vasospasm:** vasospasm confirmed by angiogram during mechanical thrombectomy.

**Stent thrombosis:** stent thrombosis confirmed by angiogram during mechanical thrombectomy.

**Dissection:** dissection confirmed by angiogram during mechanical thrombectomy.

**New vessel occlusion:** new vessel occlusion confirmed by angiogram during mechanical thrombectomy.

**SAH caused by vascular perforation:** contrast material extravasation confirmed by angiogram during mechanical thrombectomy.

**Intracranial hemorrhage:** defined by the Heidelberg Bleeding Classification[2].

**Symptomatic intracranial hemorrhage:** confirmed by the 24 hours follow-up head CT/MRI with a  $\geq 4$  points NIHSS score increase according to the Heidelberg criteria [2].

**Recanalization:** defined as m-TICI score  $\geq 2$  on the final angiogram after thrombectomy[3].

**Favorable outcome:** defined as MRS score  $\leq 2$  points at the 90-day follow-up.

**Mortality:** defined as MRS score =6 at the 90-day follow-up.

## References

- 1 Adams HP Jr., Bendixen BH, Kappelle LJ, et al. Classification of subtype of acute ischemic stroke. Definitions for use in a multicenter clinical trial. TOAST. Trial of org 10172 in acute stroke treatment. *Stroke*. 1993;24:35-41
- 2 von Kummer R, Broderick JP, Campbell BC, et al. The Heidelberg Bleeding Classification: Classification of Bleeding Events After Ischemic Stroke and Reperfusion Therapy. *Stroke*. 2015;46:2981-6.
- 3 Zaidat OO, Yoo AJ, Khatri P, et al. Recommendations on angiographic revascularization grading standards for acute ischemic stroke: a consensus statement. *Stroke*. 2013;44:2650-63.

## STROBE Statement—checklist of items that should be included in reports of observational studies

|                              | Item No | Recommendation                                                                                                                                                                             | Page No |
|------------------------------|---------|--------------------------------------------------------------------------------------------------------------------------------------------------------------------------------------------|---------|
| <b>Title and abstract</b>    | 1       | (a) Indicate the study's design with a commonly used term in the title or the abstract                                                                                                     | 1       |
|                              |         | (b) Provide in the abstract an informative and balanced summary of what was done and what was found                                                                                        | 2       |
| <b>Introduction</b>          |         |                                                                                                                                                                                            |         |
| Background/rationale         | 2       | Explain the scientific background and rationale for the investigation being reported                                                                                                       | 3       |
| Objectives                   | 3       | State specific objectives, including any prespecified hypotheses                                                                                                                           | 3       |
| <b>Methods</b>               |         |                                                                                                                                                                                            |         |
| Study design                 | 4       | Present key elements of study design early in the paper                                                                                                                                    | 3       |
| Setting                      | 5       | Describe the setting, locations, and relevant dates, including periods of recruitment, exposure, follow-up, and data collection                                                            | 3       |
| Participants                 | 6       | (a) <i>Cohort study</i> —Give the eligibility criteria, and the sources and methods of selection of participants. Describe methods of follow-up                                            | 3       |
|                              |         | <i>Case-control study</i> —Give the eligibility criteria, and the sources and methods of case ascertainment and control selection. Give the rationale for the choice of cases and controls |         |
|                              |         | <i>Cross-sectional study</i> —Give the eligibility criteria, and the sources and methods of selection of participants                                                                      |         |
|                              |         | (b) <i>Cohort study</i> —For matched studies, give matching criteria and number of exposed and unexposed                                                                                   | n/a     |
|                              |         | <i>Case-control study</i> —For matched studies, give matching criteria and the number of controls per case                                                                                 |         |
| Variables                    | 7       | Clearly define all outcomes, exposures, predictors, potential confounders, and effect modifiers. Give diagnostic criteria, if applicable                                                   | 4       |
| Data sources/<br>measurement | 8*      | For each variable of interest, give sources of data and details of methods of assessment (measurement). Describe comparability of assessment methods if there is more than one group       | 4       |
| Bias                         | 9       | Describe any efforts to address potential sources of bias                                                                                                                                  | 7       |
| Study size                   | 10      | Explain how the study size was arrived at                                                                                                                                                  | n/a     |



|    |                        |    |                                                                                                                              |
|----|------------------------|----|------------------------------------------------------------------------------------------------------------------------------|
| 1  |                        |    |                                                                                                                              |
| 2  | Quantitative variables | 11 | Explain how quantitative variables were handled in the analyses. If applicable, describe which groupings were chosen and why |
| 3  |                        |    | n/a                                                                                                                          |
| 4  |                        |    |                                                                                                                              |
| 5  | Statistical methods    | 12 | (a) Describe all statistical methods, including those used to control for confounding                                        |
| 6  |                        |    | 4-5                                                                                                                          |
| 7  |                        |    |                                                                                                                              |
| 8  |                        |    |                                                                                                                              |
| 9  |                        |    | (b) Describe any methods used to examine subgroups and interactions                                                          |
| 10 |                        |    | n/a                                                                                                                          |
| 11 |                        |    |                                                                                                                              |
| 12 |                        |    | (c) Explain how missing data were addressed                                                                                  |
| 13 |                        |    | n/a                                                                                                                          |
| 14 |                        |    | (d) <i>Cohort study</i> —If applicable, explain how loss to follow-up was addressed                                          |
| 15 |                        |    |                                                                                                                              |
| 16 |                        |    | <i>Case-control study</i> —If applicable, explain how matching of cases and controls was addressed                           |
| 17 |                        |    |                                                                                                                              |
| 18 |                        |    |                                                                                                                              |
| 19 |                        |    | <i>Cross-sectional study</i> —If applicable, describe analytical methods taking account of sampling strategy                 |
| 20 |                        |    |                                                                                                                              |
| 21 |                        |    |                                                                                                                              |
| 22 |                        |    |                                                                                                                              |
| 23 |                        |    | (e) Describe any sensitivity analyses                                                                                        |
| 24 |                        |    | 5                                                                                                                            |

Continued on next page

1  
2  
3  
4  
5  
6  
7  
8  
9  
10  
11  
12  
13  
14  
15  
16  
17  
18  
19  
20  
21  
22  
23  
24  
25  
26  
27  
28  
29  
30  
31  
32  
33  
34  
35  
36  
37  
38  
39  
40  
41  
42  
43  
44  
45  
46  
47  
48  
49  
50  
51  
52  
53  
54  
55  
56  
57  
58  
59  
60**Results**

|                          |         |                                                                                                                                                                                                              |     |
|--------------------------|---------|--------------------------------------------------------------------------------------------------------------------------------------------------------------------------------------------------------------|-----|
| Participants             | 13<br>* | (a) Report numbers of individuals at each stage of study—eg numbers potentially eligible, examined for eligibility, confirmed eligible, included in the study, completing follow-up, and analysed            | 4-5 |
|                          |         | (b) Give reasons for non-participation at each stage                                                                                                                                                         | n/a |
|                          |         | (c) Consider use of a flow diagram                                                                                                                                                                           | n/a |
| Descriptive data         | 14<br>* | (a) Give characteristics of study participants (eg demographic, clinical, social) and information on exposures and potential confounders                                                                     | 5   |
|                          |         | (b) Indicate number of participants with missing data for each variable of interest                                                                                                                          | n/a |
|                          |         | (c) <i>Cohort study</i> —Summarise follow-up time (eg, average and total amount)                                                                                                                             | n/a |
| Outcome data             | 15<br>* | <i>Cohort study</i> —Report numbers of outcome events or summary measures over time                                                                                                                          | 5   |
|                          |         | <i>Case-control study</i> —Report numbers in each exposure category, or summary measures of exposure                                                                                                         | n/a |
|                          |         | <i>Cross-sectional study</i> —Report numbers of outcome events or summary measures                                                                                                                           | n/a |
| Main results             | 16      | (a) Give unadjusted estimates and, if applicable, confounder-adjusted estimates and their precision (eg, 95% confidence interval). Make clear which confounders were adjusted for and why they were included | 5   |
|                          |         | (b) Report category boundaries when continuous variables were categorized                                                                                                                                    | 5   |
|                          |         | (c) If relevant, consider translating estimates of relative risk into absolute risk for a meaningful time period                                                                                             | n/a |
| Other analyses           | 17      | Report other analyses done—eg analyses of subgroups and interactions, and sensitivity analyses                                                                                                               | n/a |
| <b>Discussion</b>        |         |                                                                                                                                                                                                              |     |
| Key results              | 18      | Summarise key results with reference to study objectives                                                                                                                                                     | 5   |
| Limitations              | 19      | Discuss limitations of the study, taking into account sources of potential bias or imprecision. Discuss both direction and magnitude of any potential bias                                                   | 7   |
| Interpretation           | 20      | Give a cautious overall interpretation of results considering objectives, limitations, multiplicity of analyses, results from similar studies, and other relevant evidence                                   | 7   |
| Generalisability         | 21      | Discuss the generalisability (external validity) of the study results                                                                                                                                        | 7   |
| <b>Other information</b> |         |                                                                                                                                                                                                              |     |
| Funding                  | 22      | Give the source of funding and the role of the funders for the present study and, if applicable, for the original study on which the present article is based                                                | 8   |

1  
2  
3  
4 \*Give information separately for cases and controls in case-control studies and, if applicable, for exposed and  
5 unexposed groups in cohort and cross-sectional studies.  
6  
7  
8

9  
10 **Note:** An Explanation and Elaboration article discusses each checklist item and gives methodological background and  
11 published examples of transparent reporting. The STROBE checklist is best used in conjunction with this article (freely  
12 available on the Web sites of PLoS Medicine at <http://www.plosmedicine.org/>, Annals of Internal Medicine at  
13 <http://www.annals.org/>, and Epidemiology at <http://www.epidem.com/>). Information on the STROBE Initiative is  
14 available at [www.strobe-statement.org](http://www.strobe-statement.org).  
15  
16  
17  
18  
19  
20  
21  
22  
23  
24  
25  
26  
27  
28  
29  
30  
31  
32  
33  
34  
35  
36  
37  
38  
39  
40  
41  
42  
43  
44  
45  
46  
47  
48  
49  
50  
51  
52  
53  
54  
55  
56  
57  
58  
59  
60

For peer review only
