# Supplementary material for: Predicting mortality in acute ischaemic stroke treated with mechanical thrombectomy: analysis of a multicentre prospective registry
Source: PubMed Central journal article supplement — BMJ Open. 2021 Apr 1;11(4):e043415. doi: 10.1136/bmjopen-2020-043415 (PMC8021751; doi:10.1136/bmjopen-2020-043415), 2021-04-01
Supplement: bmjopen-2020-043415supp001.pdf [file bmjopen-2020-043415supp001.pdf]

### List of study variables and outcomes definition

**Smoking:** defined as self-reports of cigarette smoking in the past, or currently.

**Diabetes mellitus:** defined as self-reports of diabetes mellitus or taking oral antidiabetic agents or injecting insulin.

**Hypertension:** defined as self-reports of hypertension, taking antihypertensive agents.

**Atrial fibrillation:** defined as self-reports of atrial fibrillation, taking or not taking anticoagulant agents.

**Coronary artery disease:** defined as self-reports of Coronary artery disease.

**Previous stroke:** defined as self-reports of stroke, including hemorrhagic and ischemic stroke.

**TOAST classification:** assessed by MRI, MRA and CTA based on Trial of Org 10172 in Acute Stroke Treatment (TOAST) criteria [1].

**Vasospasm:** vasospasm confirmed by angiogram during mechanical thrombectomy.

**Stent thrombosis:** stent thrombosis confirmed by angiogram during mechanical thrombectomy.

**Dissection:** dissection confirmed by angiogram during mechanical thrombectomy.

**New vessel occlusion:** new vessel occlusion confirmed by angiogram during mechanical thrombectomy.

**SAH caused by vascular perforation:** contrast material extravasation confirmed by angiogram during mechanical thrombectomy.

**Intracranial hemorrhage:** defined by the Heidelberg Bleeding Classification[2].

**Symptomatic intracranial hemorrhage:** confirmed by the 24 hours follow-up head CT/MRI with a  $\geq 4$  points NIHSS score increase according to the Heidelberg criteria [2].

**Recanalization:** defined as m-TICI score  $\geq 2b$  on the final angiogram after thrombectomy[3].

**Favorable outcome:** defined as MRS score  $\leq 2$  points at the 90-day follow-up.

**Mortality:** defined as MRS score =6 at the 90-day follow-up.

## References

- 1 Adams HP Jr., Bendixen BH, Kappelle LJ, et al. Classification of subtype of acute ischemic stroke. Definitions for use in a multicenter clinical trial. TOAST. Trial of org 10172 in acute stroke treatment. *Stroke*. 1993;24:35–41
- 2 von Kummer R, Broderick JP, Campbell BC, et al. The Heidelberg Bleeding Classification: Classification of Bleeding Events After Ischemic Stroke and Reperfusion Therapy. *Stroke*. 2015;46:2981-6.
- 3 Zaidat OO, Yoo AJ, Khatri P, et al. Recommendations on angiographic revascularization grading standards for acute ischemic stroke: a consensus statement. *Stroke*. 2013;44:2650-63.
